# Supplementary material for: Synthesis, Structure, and Cyclocondensation of the 4,4,4-Trifluoro-3,3-dihydroxy-2-methyl-1-(thien-2-yl)-1-butanone with Hydroxylamine and Hydrazine
Source: Hindawi journal article supplement (doi:10.1155/2018/8348652), 2018-01-01
Supplement: f1 [file 8348652.f1.doc]

**Synthesis, structure and cyclocondensation of 4,4,4-trifluoro-3,3-dihydroxy-2-methyl-1-(thien-2-yl)-1-butanone with hydroxylamine and hydrazine**

*Alex F. C. Flores*,1*, *Bruna P. Kuhn2*, *Mariano A. Pereira3,*

*Tatiane L. Balliano3, Givanildo S. da Silva3*

*1Escola de Química e Alimentos*, *Universidade Federal de Rio Grande–96203 900*,

*Rio Grande*, *RS*, *Brazil*

*2Departamento de Química*, *Universidade Federal de Santa Maria – 97105 900*,

*Santa Maria*, *RS*, *Brazil*

*3LabCriMM Instituto de Química e Biotecnologia - Universidade Federal de Alagoas*

*57072-970, Maceió, AL, Brazil*

**Graphical Abstract**

**Figure S1.** 1H NMR spectrum (400.13 MHz, CDCl3) of the mixture of 4,4,4-trifluoro-2-methyl-1-(thien-2-yl)butan-1,3-dione (2, 55.6%) and 4,4,4-trifluoro-3,3-dihydroxy-2-

methyl-1-(thien-2-yl)butan-1-one(**3**, 44.4%).

**Figure S2.** 13C NMR spectrum (100.62 MHz, CDCl3) of the mixture of 4,4,4-trifluoro-2-methyl-1-(thien-2-yl)butan-1,3-dione (**2**, 55.6%) and 4,4,4-trifluoro-3,3-dihydroxy-2-methyl-1-(thien-2-yl)butan-1-one(**3**, 44.4%).

**Figure S3.** 1H NMR spectrum (400.13 MHz, CDCl3) of 4,4,4-trifluoro-3,3-dihydroxy-2-methyl-1-(thien-2-yl)butan-1-one(**3**).

**Figure S4.** 1H NMR spectrum (100.62 MHz, CDCl3) of 4,4,4-trifluoro-3,3-dihydroxy-2-methyl-1-(thien-2-yl)butan-1-one(**3**).

**Figure S5.** 1H NMR spectrum (100.62 MHz, CDCl3) of 4,4,4-trifluoro-3,3-dihydroxy-2-methyl-1-(thien-2-yl)butan-1-one(**3**), expanded between 90-140 ppm.

**Figure S6.** 1H NMR spectrum (400.13 MHz, CDCl3) of 5-trifluoromethyl-5-hydroxy-4-methyl-3-(thien-2-yl)-4,5-dihydroisoxazole(**4**), a diasteroisomeric mixture.

**Figure S7.** 1H NMR spectrum (400.13 MHz, CDCl3) of 5-trifluoromethyl-5-hydroxy-4-methyl-3-(thien-2-yl)-4,5-dihydroisoxazole(**4**), a diasteroisomeric mixture, expanded between 1.0-4.2 ppm.

**Figure S8.** 13C NMR spectrum (100.62 MHz, CDCl3) of 5-trifluoromethyl-5-hydroxy-4-methyl-3-(thien-2-yl)-4,5-dihydroisoxazole(**4**), a diasteroisomeric mixture.

**Figure S9.** 13C NMR spectrum (100.62 MHz, CDCl3) of 5-trifluoromethyl-5-hydroxy-4-methyl-3-(thien-2-yl)-4,5-dihydroisoxazole(**4**), a diasteroisomeric mixture, expanded between 10-55 ppm.

**Figure S10.** 13C NMR spectrum (100.62 MHz, CDCl3) of 5-trifluoromethyl-5-hydroxy-4-methyl-3-(thien-2-yl)-4,5-dihydroisoxazole(**4**), a diasteroisomeric mixture, expanded between 102-131 ppm.

**Figure S11.** 2D HSQC NMR spectrum (CDCl3) of the diasteroisomeric mixture 5-trifluoro methyl-5-hydroxy-4-methyl-3-(thien-2-yl)-4,5-dihydroisoxazole(**4a/4b**).

**Figure S12.** 2D HSQC NMR spectrum (CDCl3) of the diasteroisomeric mixture 5-trifluoro methyl-5-hydroxy-4-methyl-3-(thien-2-yl)-4,5-dihydroisoxazole(**4a/4b**), expanded in the H-4 region.

**Figure S13.** 2D HSQC NMR spectrum (CDCl3) of the diasteroisomeric mixture 5-trifluoro methyl-5-hydroxy-4-methyl-3-(thien-2-yl)-4,5-dihydroisoxazole(**4a/4b**), expanded in the thien-2-yl region.

**Figure S14.** 2D HMBC NMR spectrum (CDCl3) of the diasteroisomeric mixture 5-trifluoro methyl-5-hydroxy-4-methyl-3-(thien-2-yl)-4,5-dihydroisoxazole(**4a/4b**).

**Figure S15.** 2D HMBC NMR spectrum (CDCl3) of the diasteroisomeric mixture 5-trifluoro methyl-5-hydroxy-4-methyl-3-(thien-2-yl)-4,5-dihydroisoxazole(**4a/4b**), expanded in the methyl-4 region.

**Figure S16.** 2D HMBC NMR spectrum (CDCl3) of the diasteroisomeric mixture 5-trifluoro methyl-5-hydroxy-4-methyl-3-(thien-2-yl)-4,5-dihydroisoxazole(**4a/4b**), expanded in the H-4 region.

**Figure S17.** High Resolution Mass Spectrum of diasteroisomeric mixture 5-trifluoromethyl-5-hydroxy-4-methyl-3-(thien-2-yl)-4,5-dihydroisoxazole(**4**).

**Figure S18.** 1H NMR spectrum (400.13 MHz, CDCl3) of 5(3)-trifluoromethyl-4-methyl-3(5)-(thien-2-yl)-1*H*-pyrazole(**5**).

**Figure S19**. 13C NMR spectrum (100.62 MHz, CDCl3) of 5(3)-trifluoromethyl-4-methyl-3(5)-(thien-2-yl)-1*H*-pyrazole(**5**).

Figure S20. 13C NMR spectrum (100.62 MHz, CDCl3) of 5(3)-trifluoromethyl-4-methyl-3(5)-(thien-2-yl)-1*H*-pyrazole(5), expanded between 105-150 ppm.

Figure S21. High resolution mas spectrum of 5(3)-trifluoromethyl-4-methyl-3(5)-(thien-2-yl)-1*H*-pyrazole(5).

Figure S22. ORTEP drawing of 4,4,4-trifluoro-3,3-dihydroxy-2-methyl-1-(thien-2-yl)-1-butenone (3), showing all non-hydrogen atoms and atom-numbering scheme; 50% probability amplitude displacement ellipsoids are shown.

**Figure S23.** Crystalline supramolecular packing diagram of 4,4,4-trifluoro-3,3-dihydroxy-2-methyl-1-(thien-2-yl)-1-butenone(**3**), view along the *b*-axis.

**Figure S24.** Crystalline supramolecular packing diagram of 4,4,4-trifluoro-3,3-dihydroxy-2-methyl-1-(thien-2-yl)-1-butenone(**3**), view along the *a*-axis.

**Figure S25.** Partial view of the infinite 3D-structure formed by the different units of **3**, showing intra and intermolecular hydrogen bonds as dashed lines.

Table S1. Crystallographic data and structure refinement parameters for 4,4,4-trifluoro-3,3-dihydroxy-2-methyl-1-(thien-2-yl)butan-1-one (3).

**Table S2.** Atomic coordinates (x104) and equivalent isotropic displacement parameters (Å2x103). U(eq) is defined as one third of trace of the orthogonalized U*ij* tensor.

**Table S3**. Bond lengths (Å) for **3**.

**Table S4**. Bond angles (º) for **3**.

**Table S5**. Hydrogens coordinates (x 104) and equivalent isotropic displacement parameters (Å2 x 103).

**Table S6**. Torsion angles [o] for **3**.

**Table S7**. Hydrogen-bonding geometry for **3** (Å and º).

**Table S8.** Atomic displacement parameters (Å2) to **3**.

**Figure S26.** Prismatic crystalline solid of 3(5)-trifluoromethyl-4-methyl-5(3)-(thien-2-yl)-1*H*-pyrazole (5) obtained from recrystallitazion in hexane.

Figure S27. ORTEP drawing of 3(5)-trifluoromethyl-4-methyl-5(3)-(thien-2-yl)-1*H*-pyrazole (5), showing all non-hydrogen atoms and atom-numbering scheme; 50% probability amplitude displacement ellipsoids are shown.

**Figure S28.** Crystalline supramolecular packing diagram of 3(5)-trifluoromethyl-4-methyl-5(3)-(thien-2-yl)-1*H*-pyrazole(**5**), view along the *b*-axis.

**Figure S29.** Crystalline supramolecular packing diagram of 3(5)-trifluoromethyl-4-methyl-5(3)-(thien-2-yl)-1*H*-pyrazole(**5**), view along the *c*-axis.

**Figure S30.** Crystalline supramolecular packing diagram of 3(5)-trifluoromethyl-4-methyl-5(3)-(thien-2-yl)-1*H*-pyrazole(**5**), view along the *a*-axis.

**Figure S31.** Partial view of the infinite 3D-structure formed by the different units of **5**, showing intermolecular hydrogen bonds as dashed lines.

**Table S9.** Crystallographic data and structure refinements for 3(5)-trifluoromethyl-4-methyl-5(3)-(thien-2-yl)-1*H*-pyrazole (**5**).

**Table S10**. Atomic coordinates (x104) and equivalent isotropic displacement parameters (Å2x103). U(eq) is defined as one third of trace of the orthogonalized Uij tensor

**Table S11**. Bond lengths (Å) for **5**.

**Table S12**. Bond angles [o] for **5**.

**Table S13**. Hydrogen bonding geometry for **5** (Å and °).

**Table S14**. Hydrogens coordinates (x 104) and isotropic displacement parameters (Å2 x 103) for **5**.

**Table S15**. Atomic displacement parameters (Å2) to **5**.

**Table S16**. Torsion angles [o] for **5**.


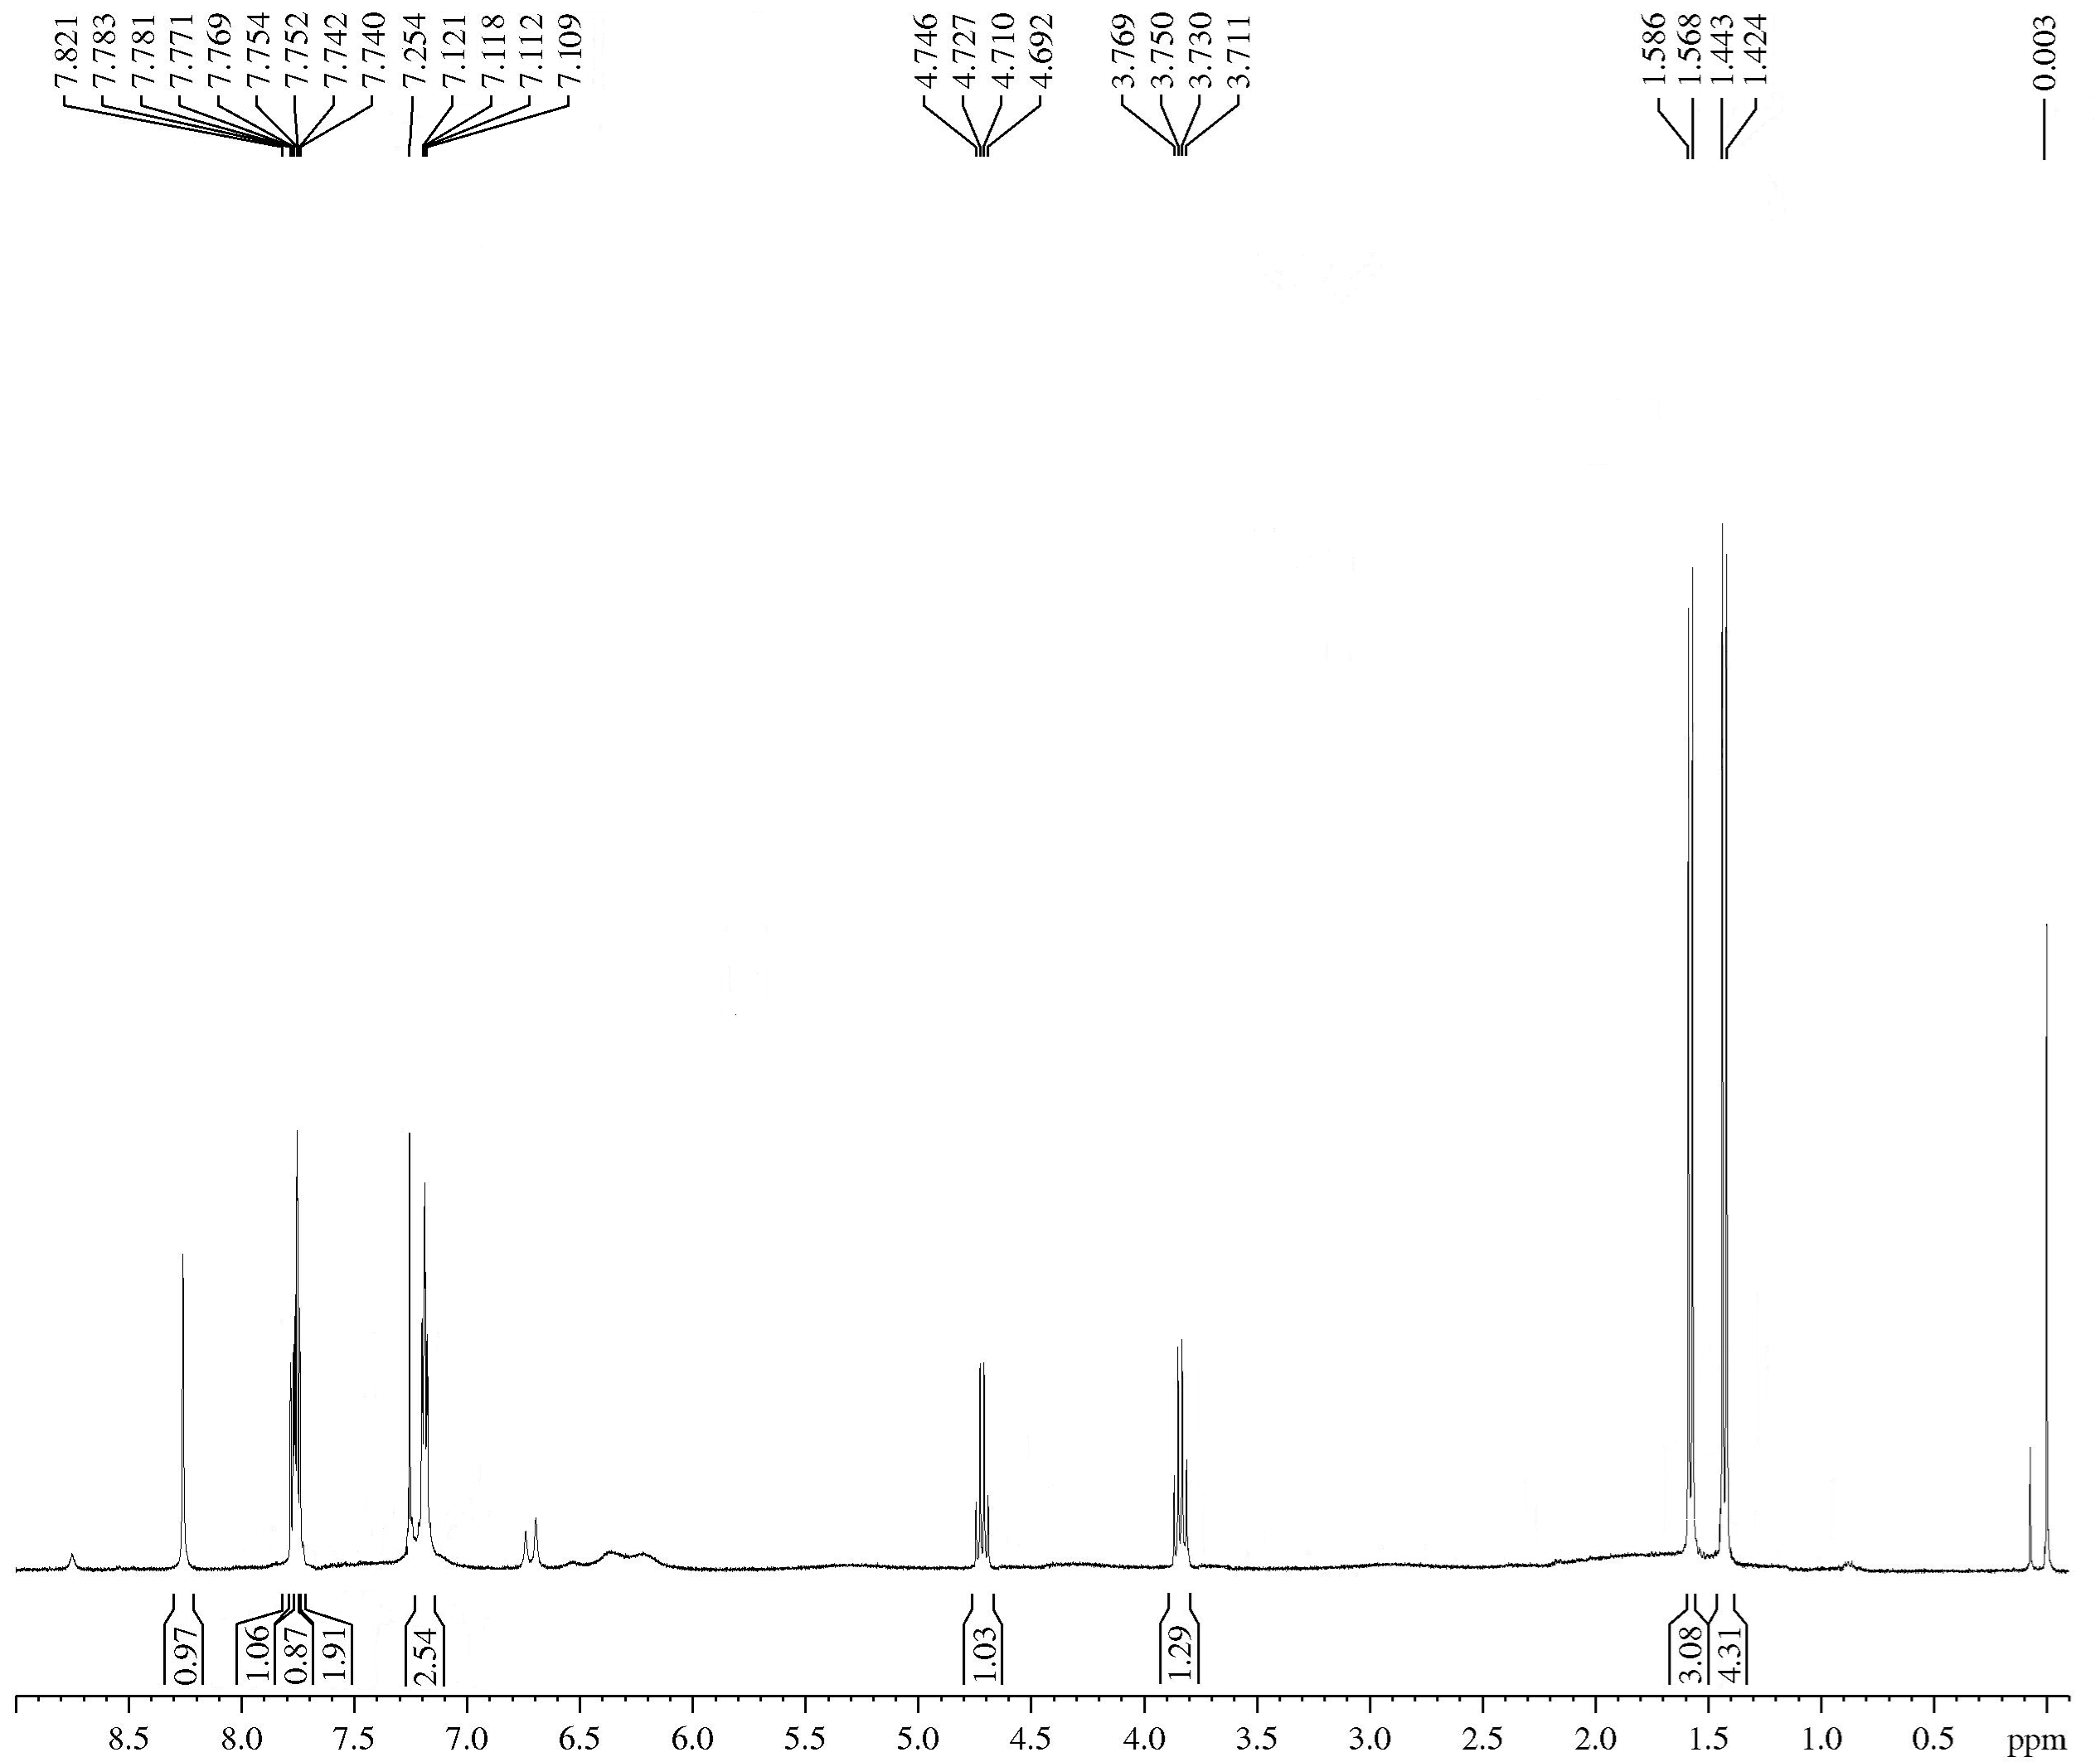


**Figure S1.** 1H NMR spectrum (400.13 MHz, CDCl3) of the mixture of 4,4,4-trifluoro-2-methyl-1-(thien-2-yl)butan-1,3-dione (**2**, 55.6%) and 4,4,4-trifluoro-3,3-dihydroxy-2-

methyl-1-(thien-2-yl)butan-1-one(**3**, 44.4%).


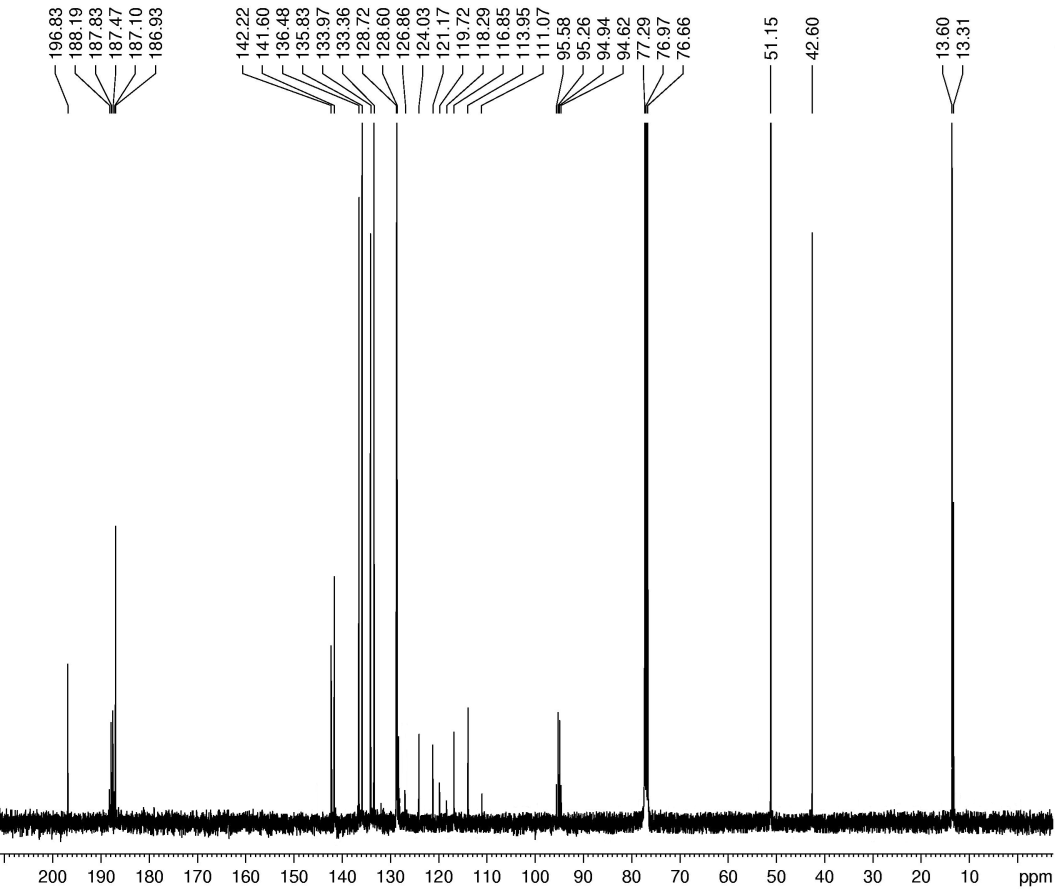


**Figure S2.** 13C NMR spectrum (100.62 MHz, CDCl3) of the mixture of 4,4,4-trifluoro-2-methyl-1-(thien-2-yl)butan-1,3-dione (**2**, 55.6%) and 4,4,4-trifluoro-3,3-dihydroxy-2-methyl-1-(thien-2-yl)butan-1-one(**3**, 44.4%).


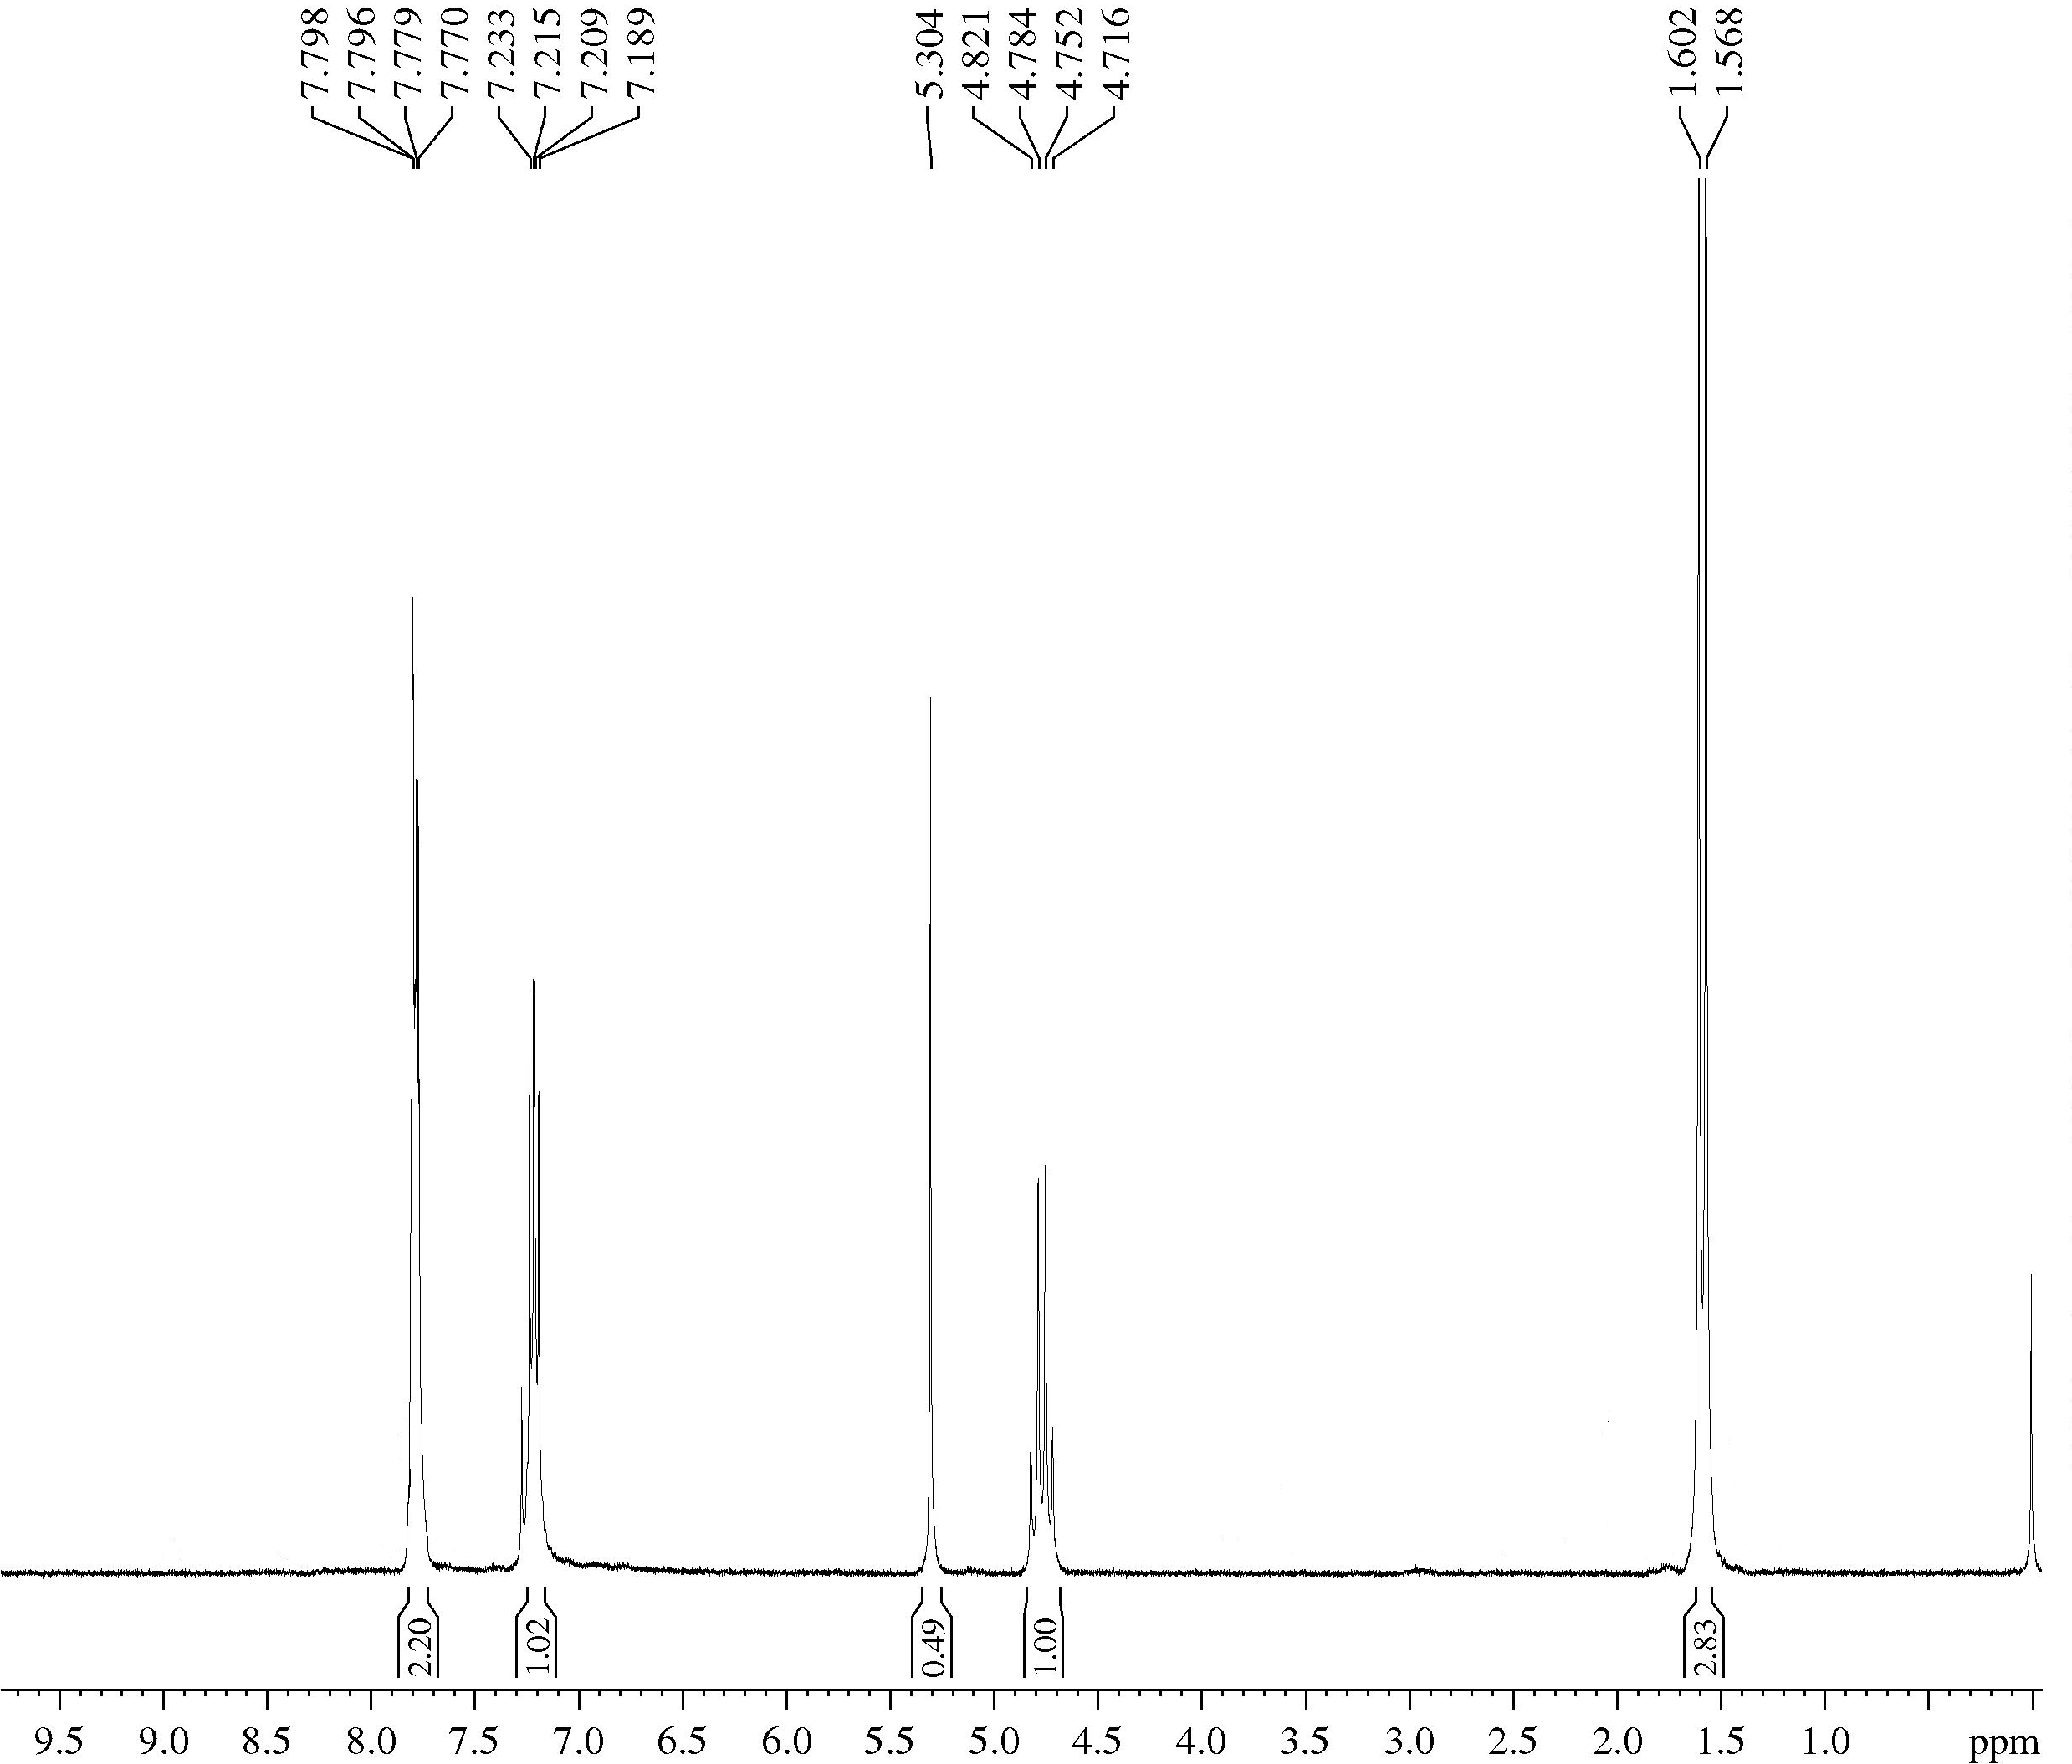


**Figure S3.** 1H NMR spectrum (400.13 MHz, CDCl3) of 4,4,4-trifluoro-3,3-dihydroxy-2-methyl-1-(thien-2-yl)butan-1-one(**3**).


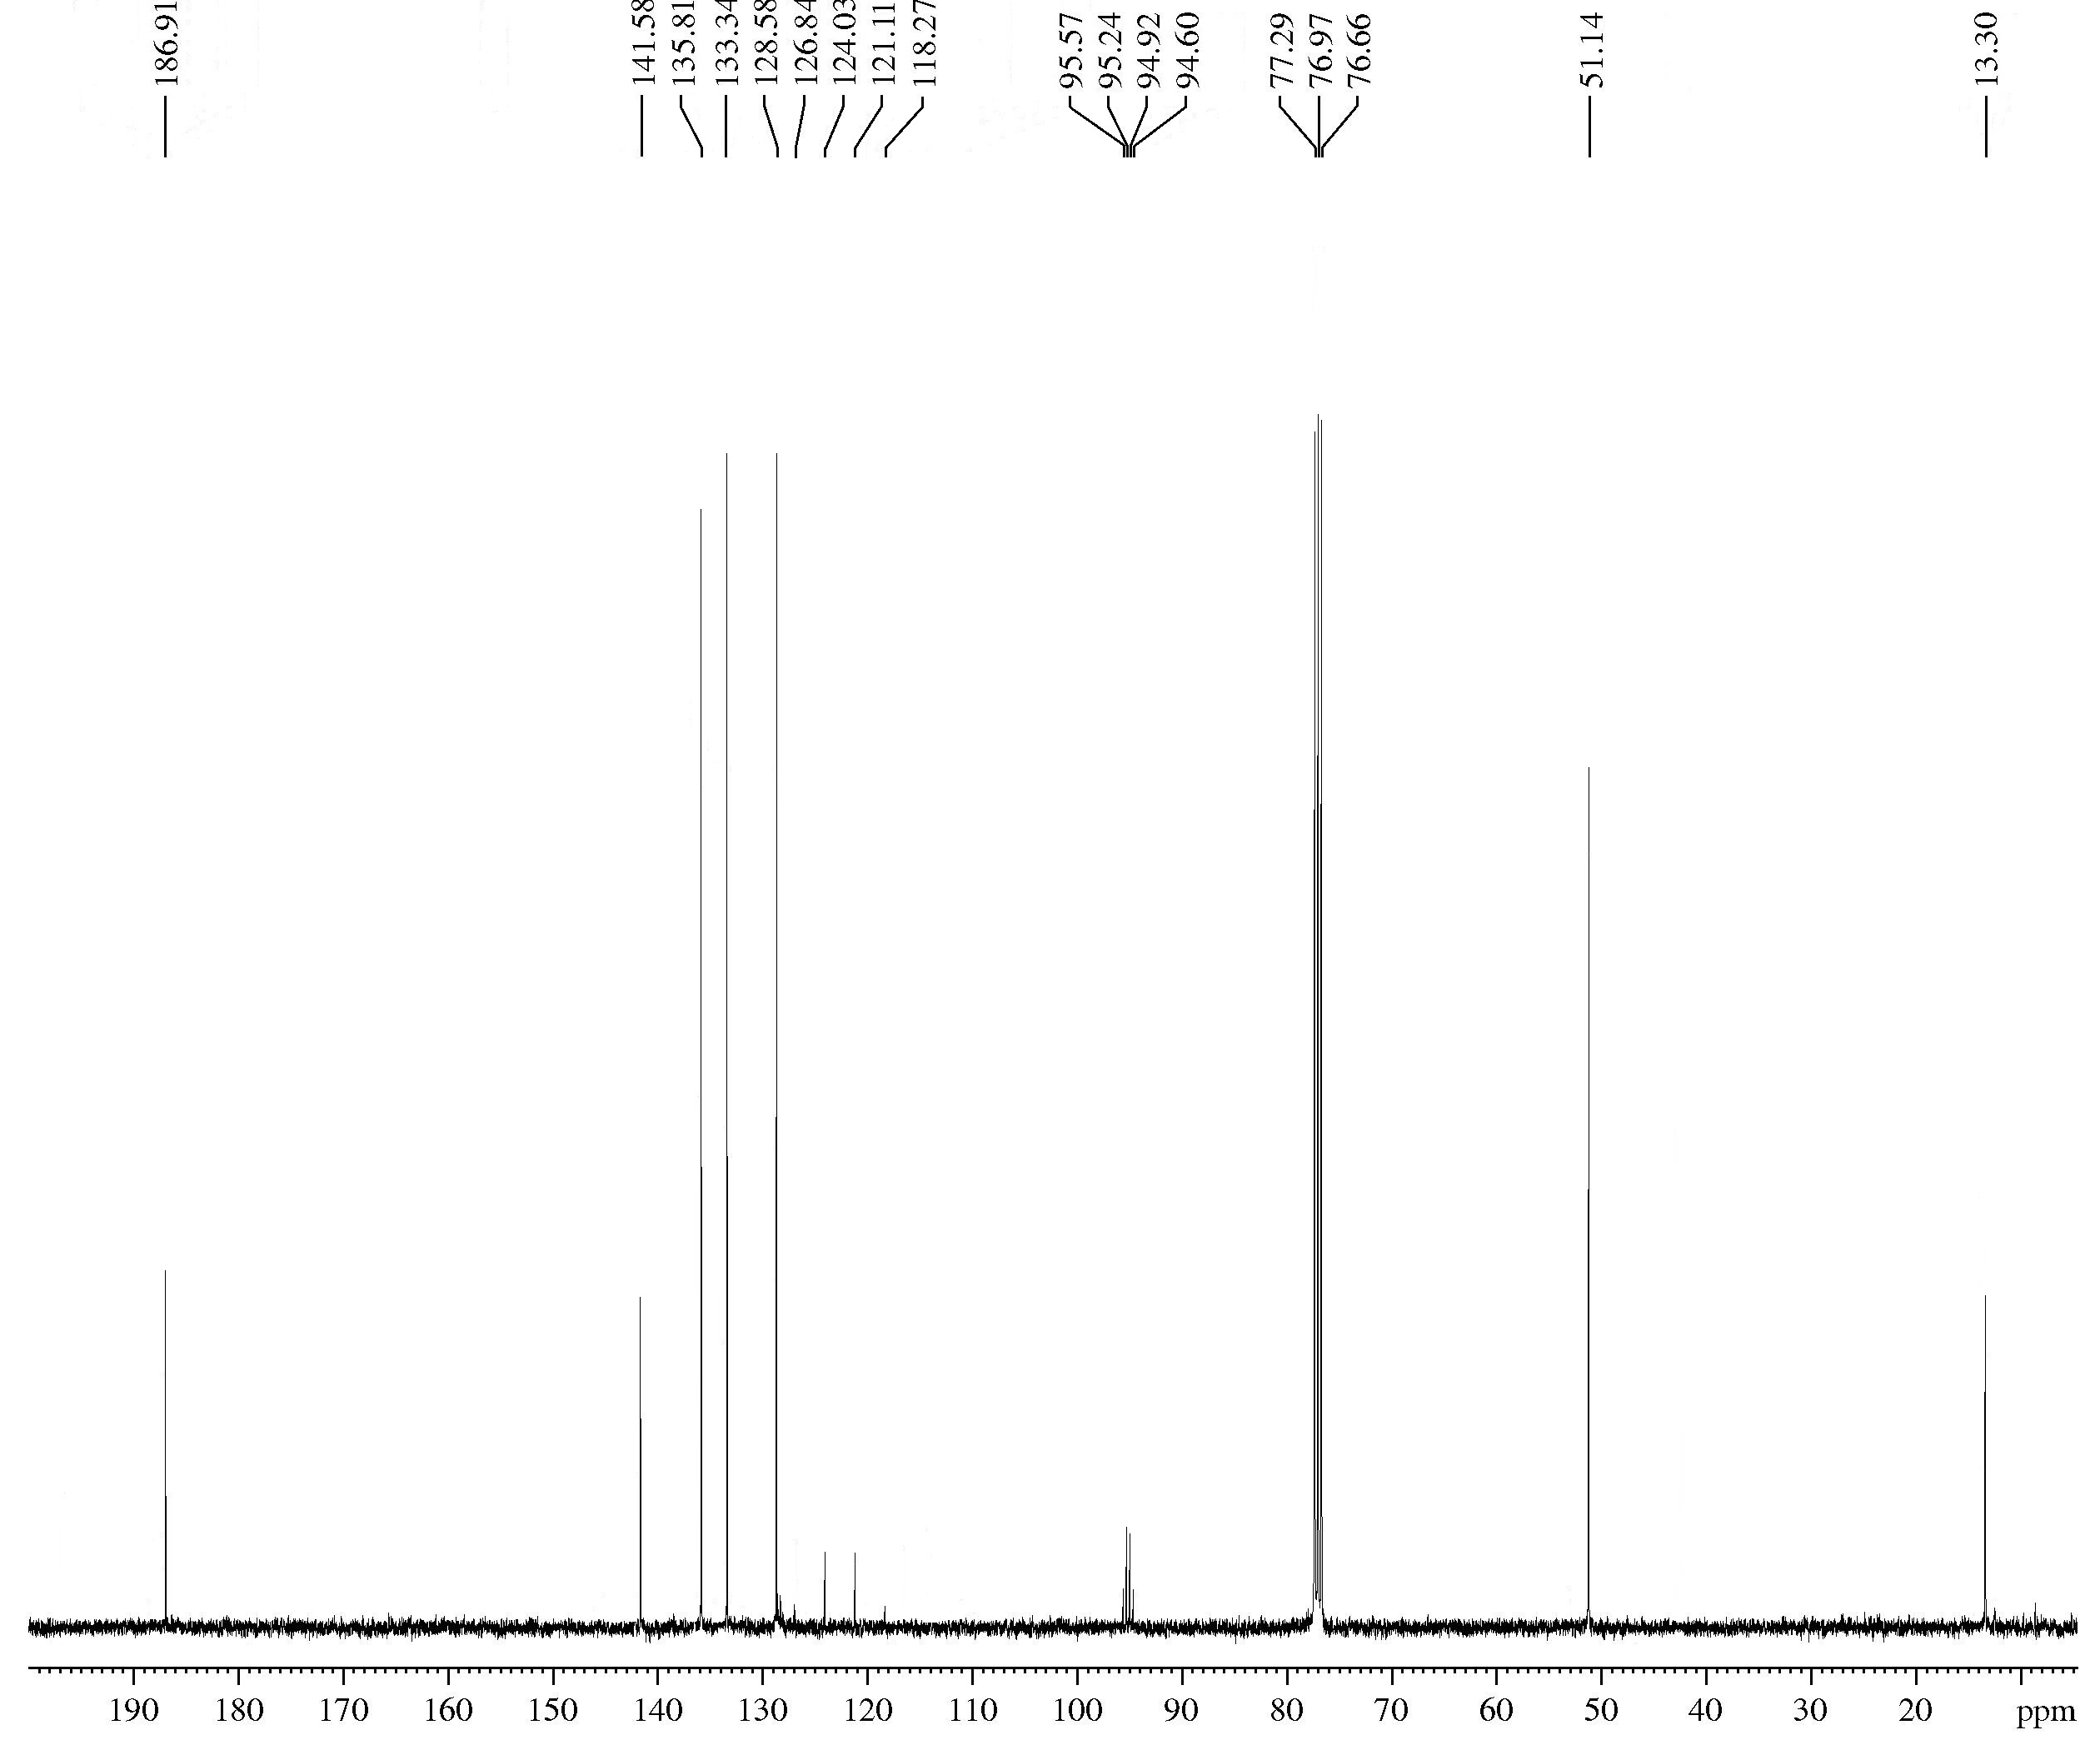


**Figure S4.** 1H NMR spectrum (100.62 MHz, CDCl3) of 4,4,4-trifluoro-3,3-dihydroxy-2-methyl-1-(thien-2-yl)butan-1-one(**3**).


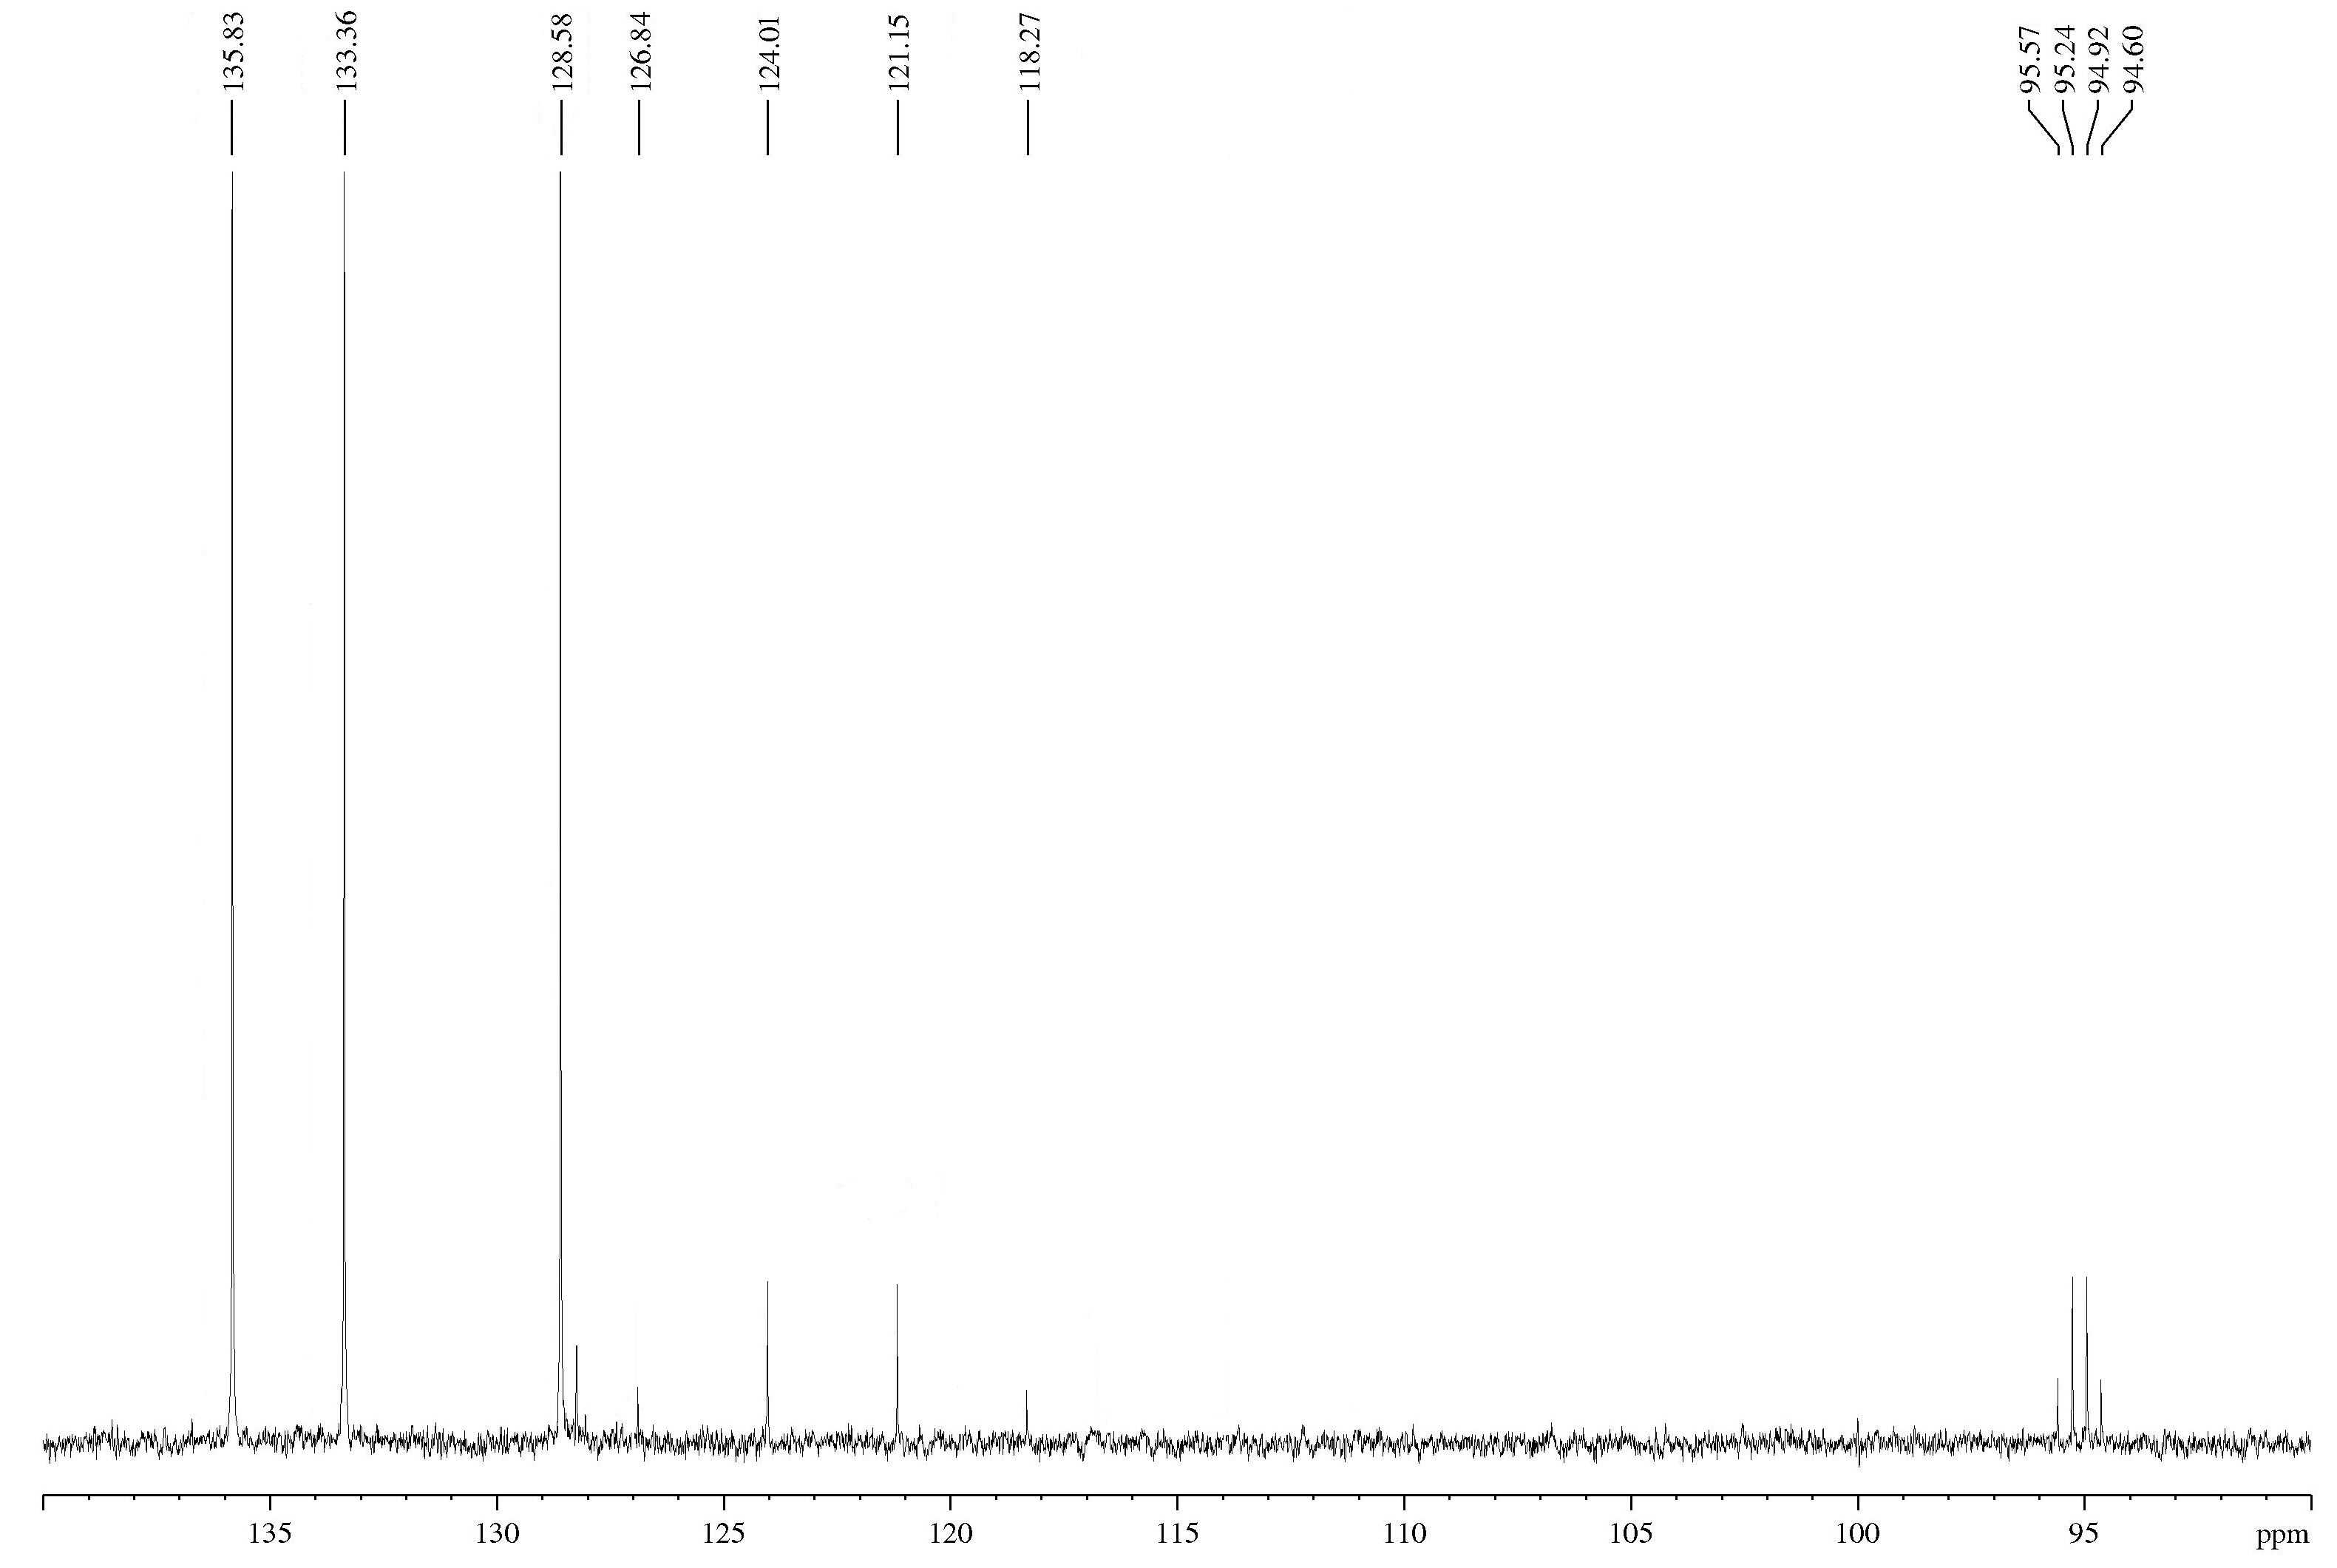


**Figure S5.** 1H NMR spectrum (100.62 MHz, CDCl3) of 4,4,4-trifluoro-3,3-dihydroxy-2-methyl-1-(thien-2-yl)butan-1-one(**3**), expanded between 90-140 ppm.


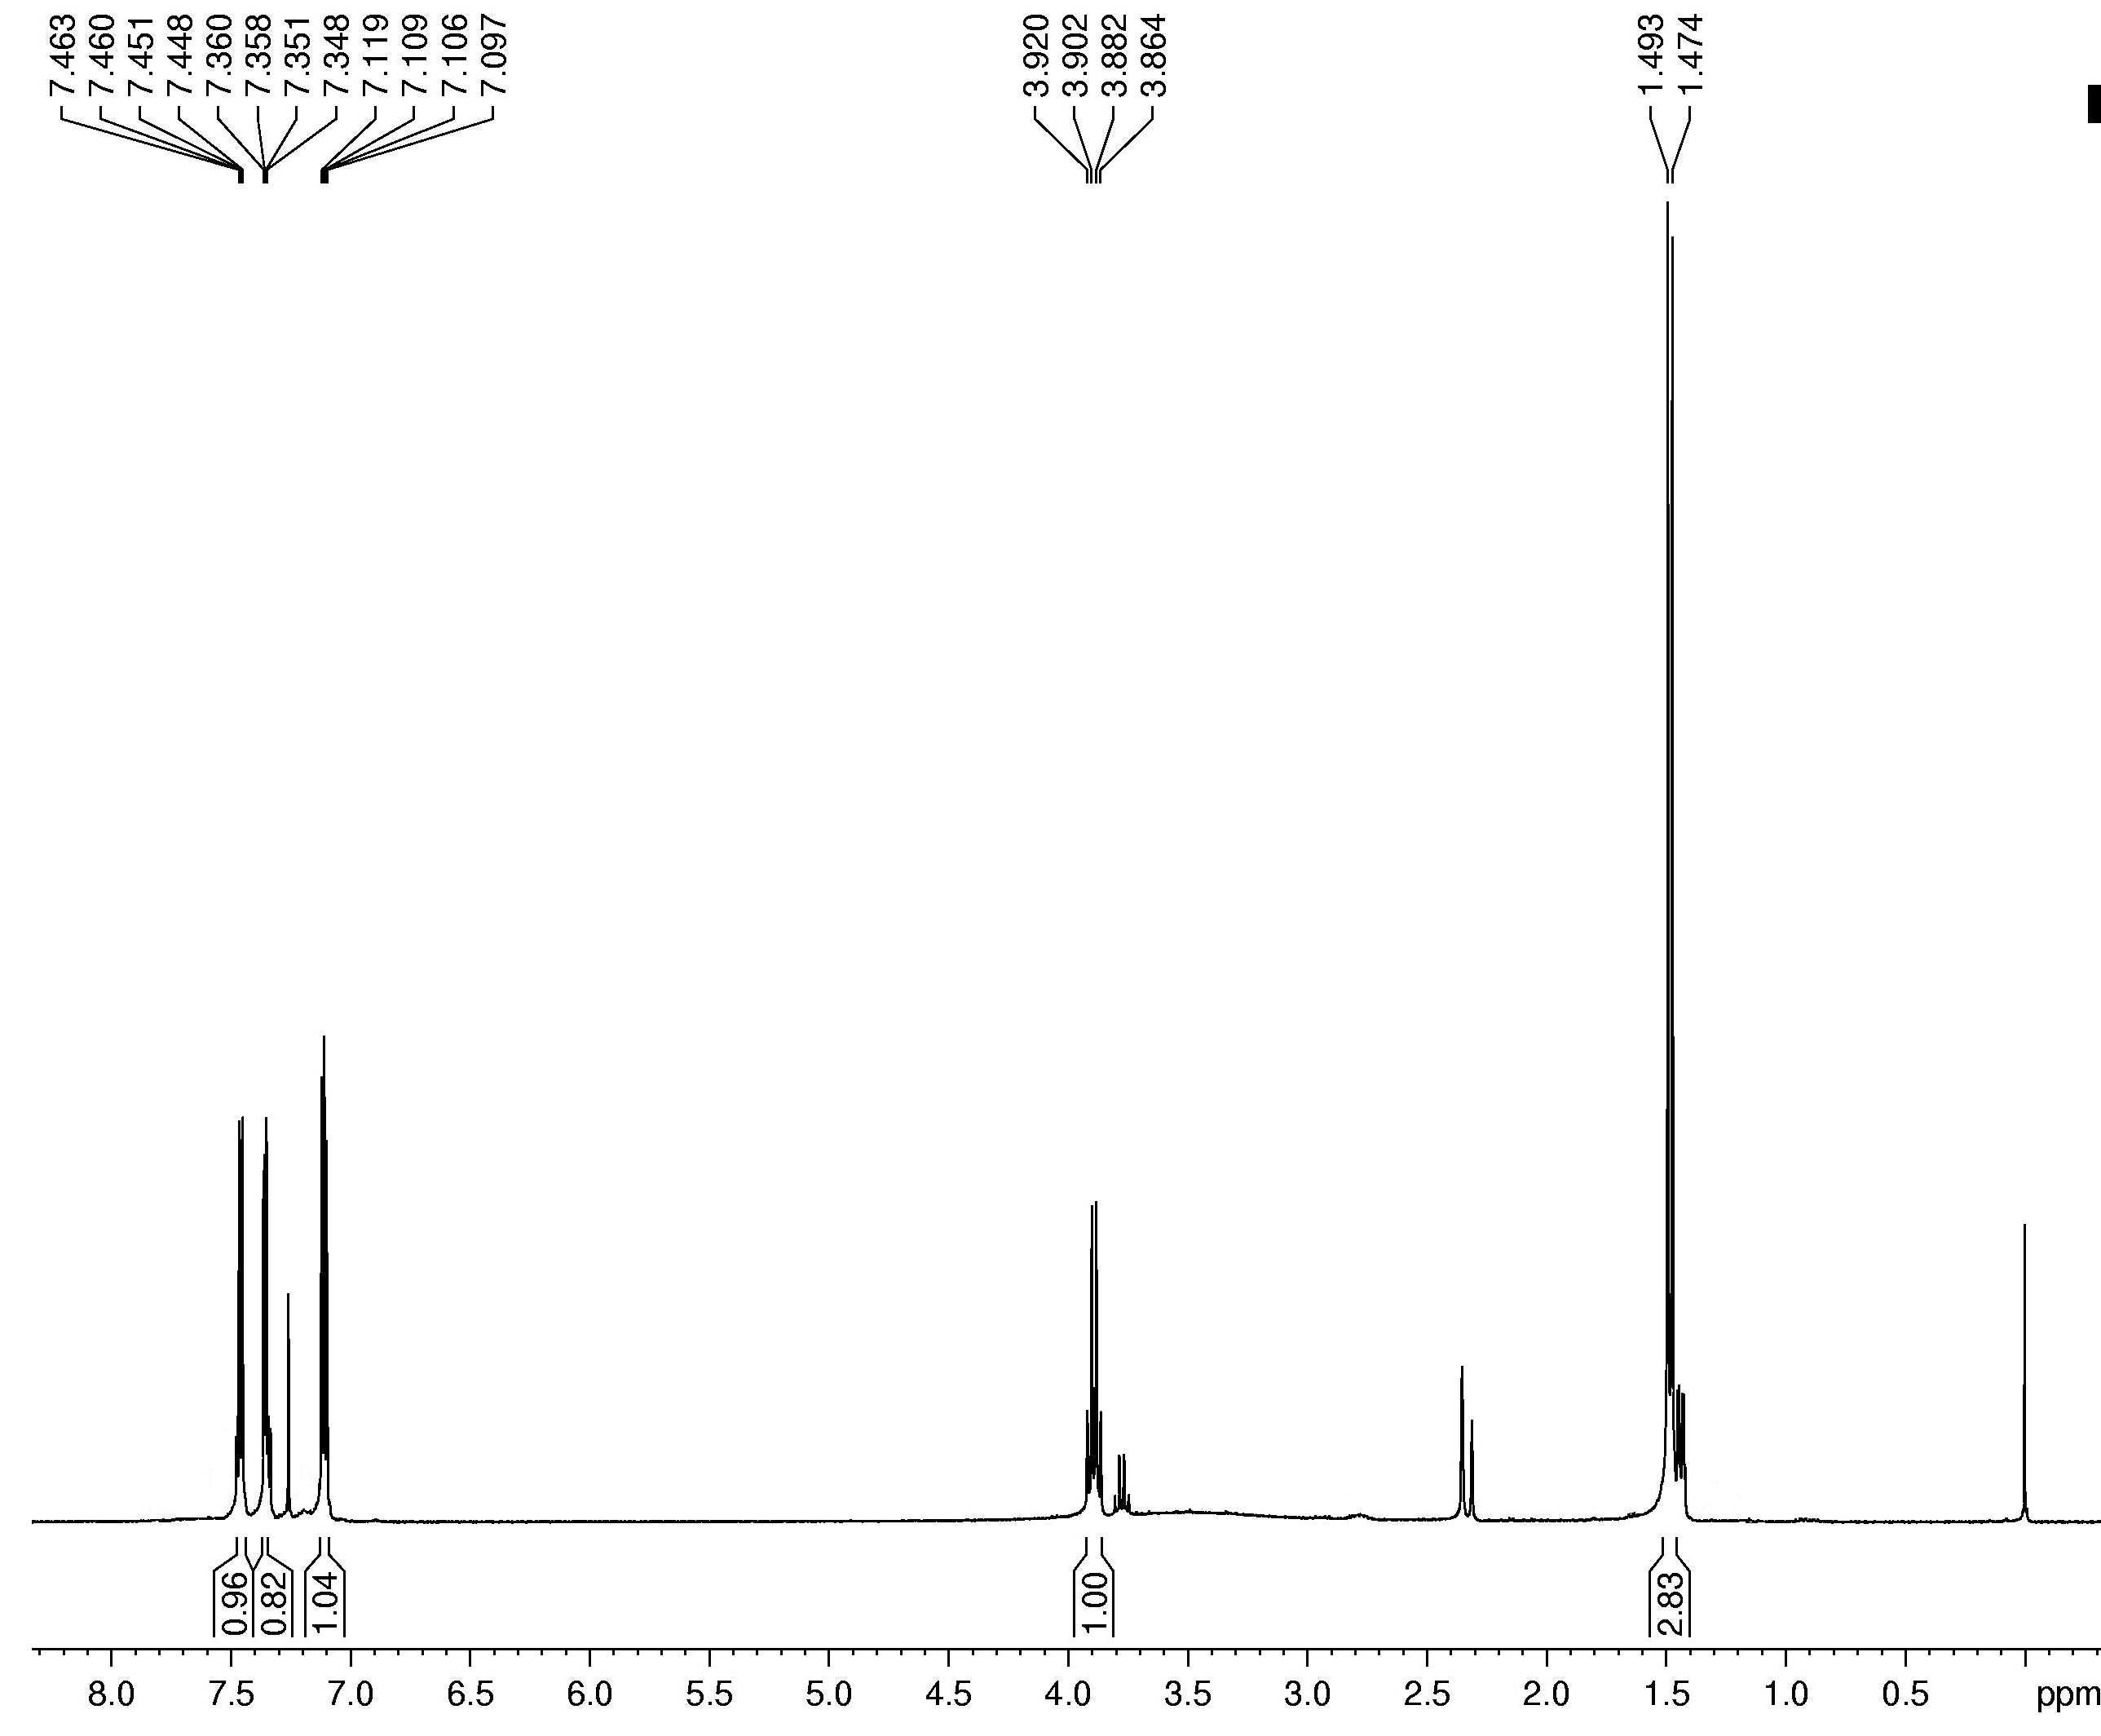


**Figure S6.** 1H NMR spectrum (400.13 MHz, CDCl3) of 5-trifluoromethyl-5-hydroxy-4-methyl-3-(thien-2-yl)-4,5-dihydroisoxazole(**4**), a diasteroisomeric mixture.


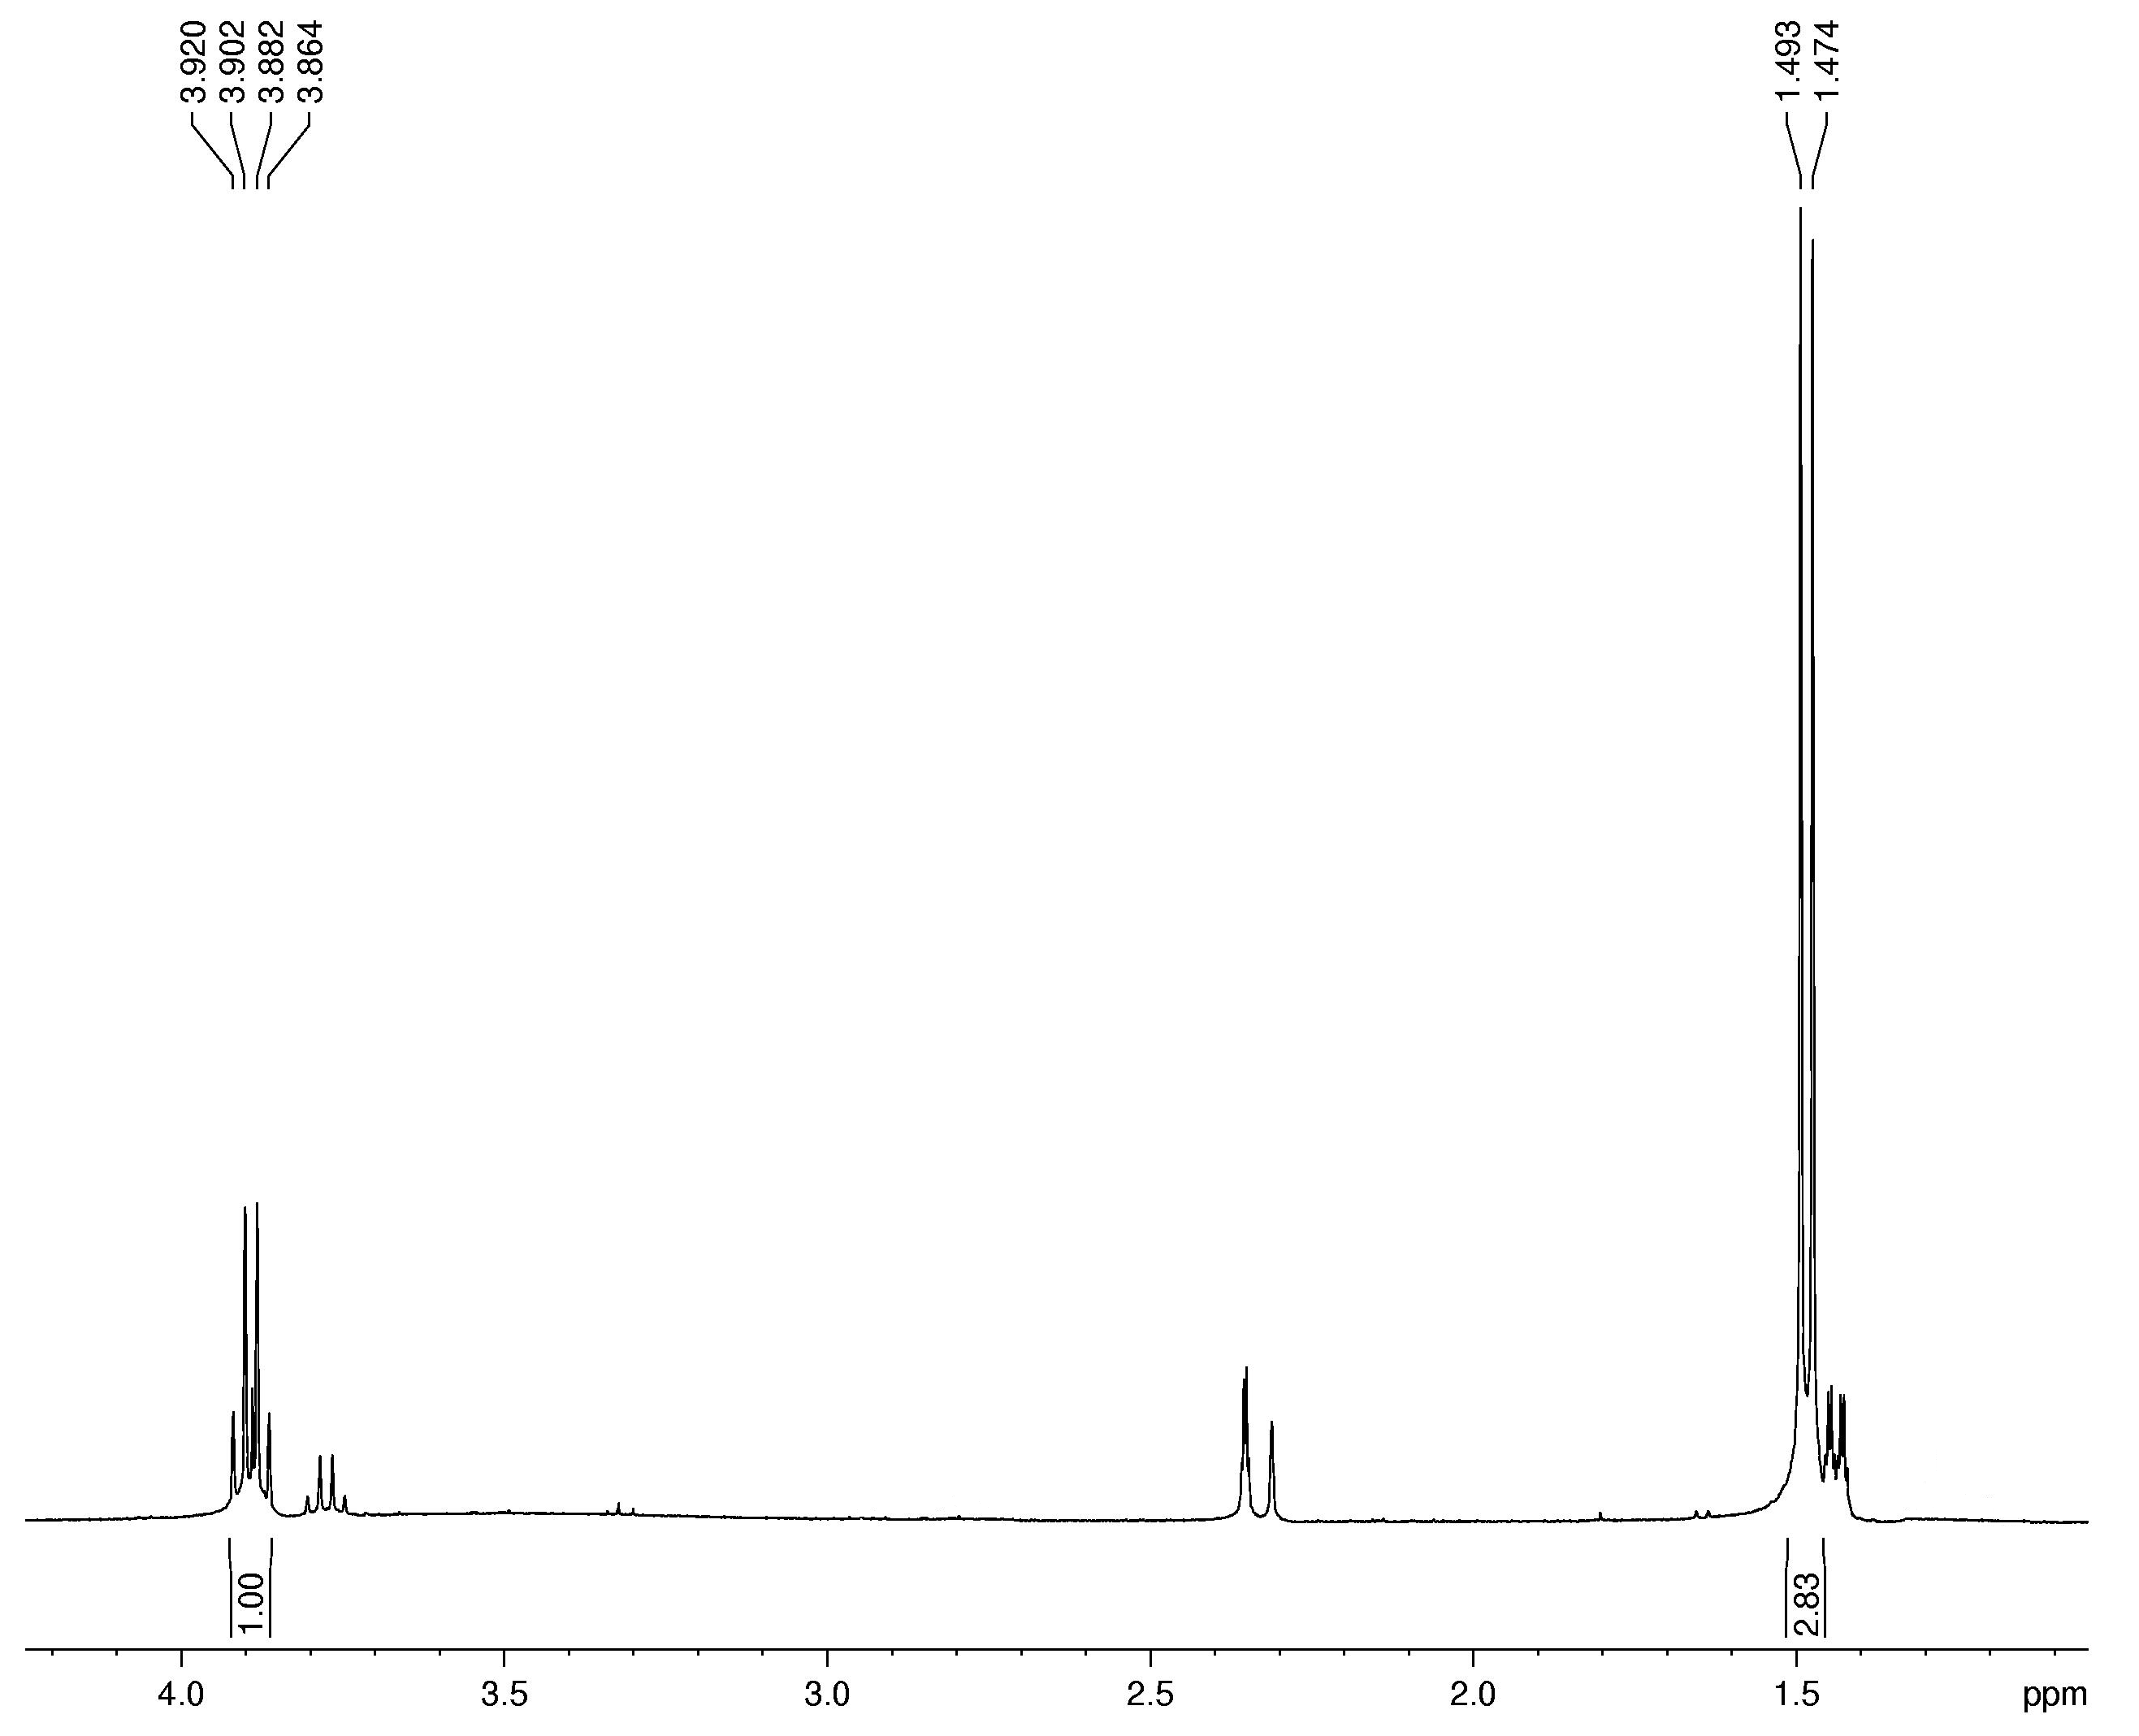


**Figure S7.** 1H NMR spectrum (400.13 MHz, CDCl3) of 5-trifluoromethyl-5-hydroxy-4-methyl-3-(thien-2-yl)-4,5-dihydroisoxazole(**4**), a diasteroisomeric mixture, expanded between 1.0-4.2 ppm.


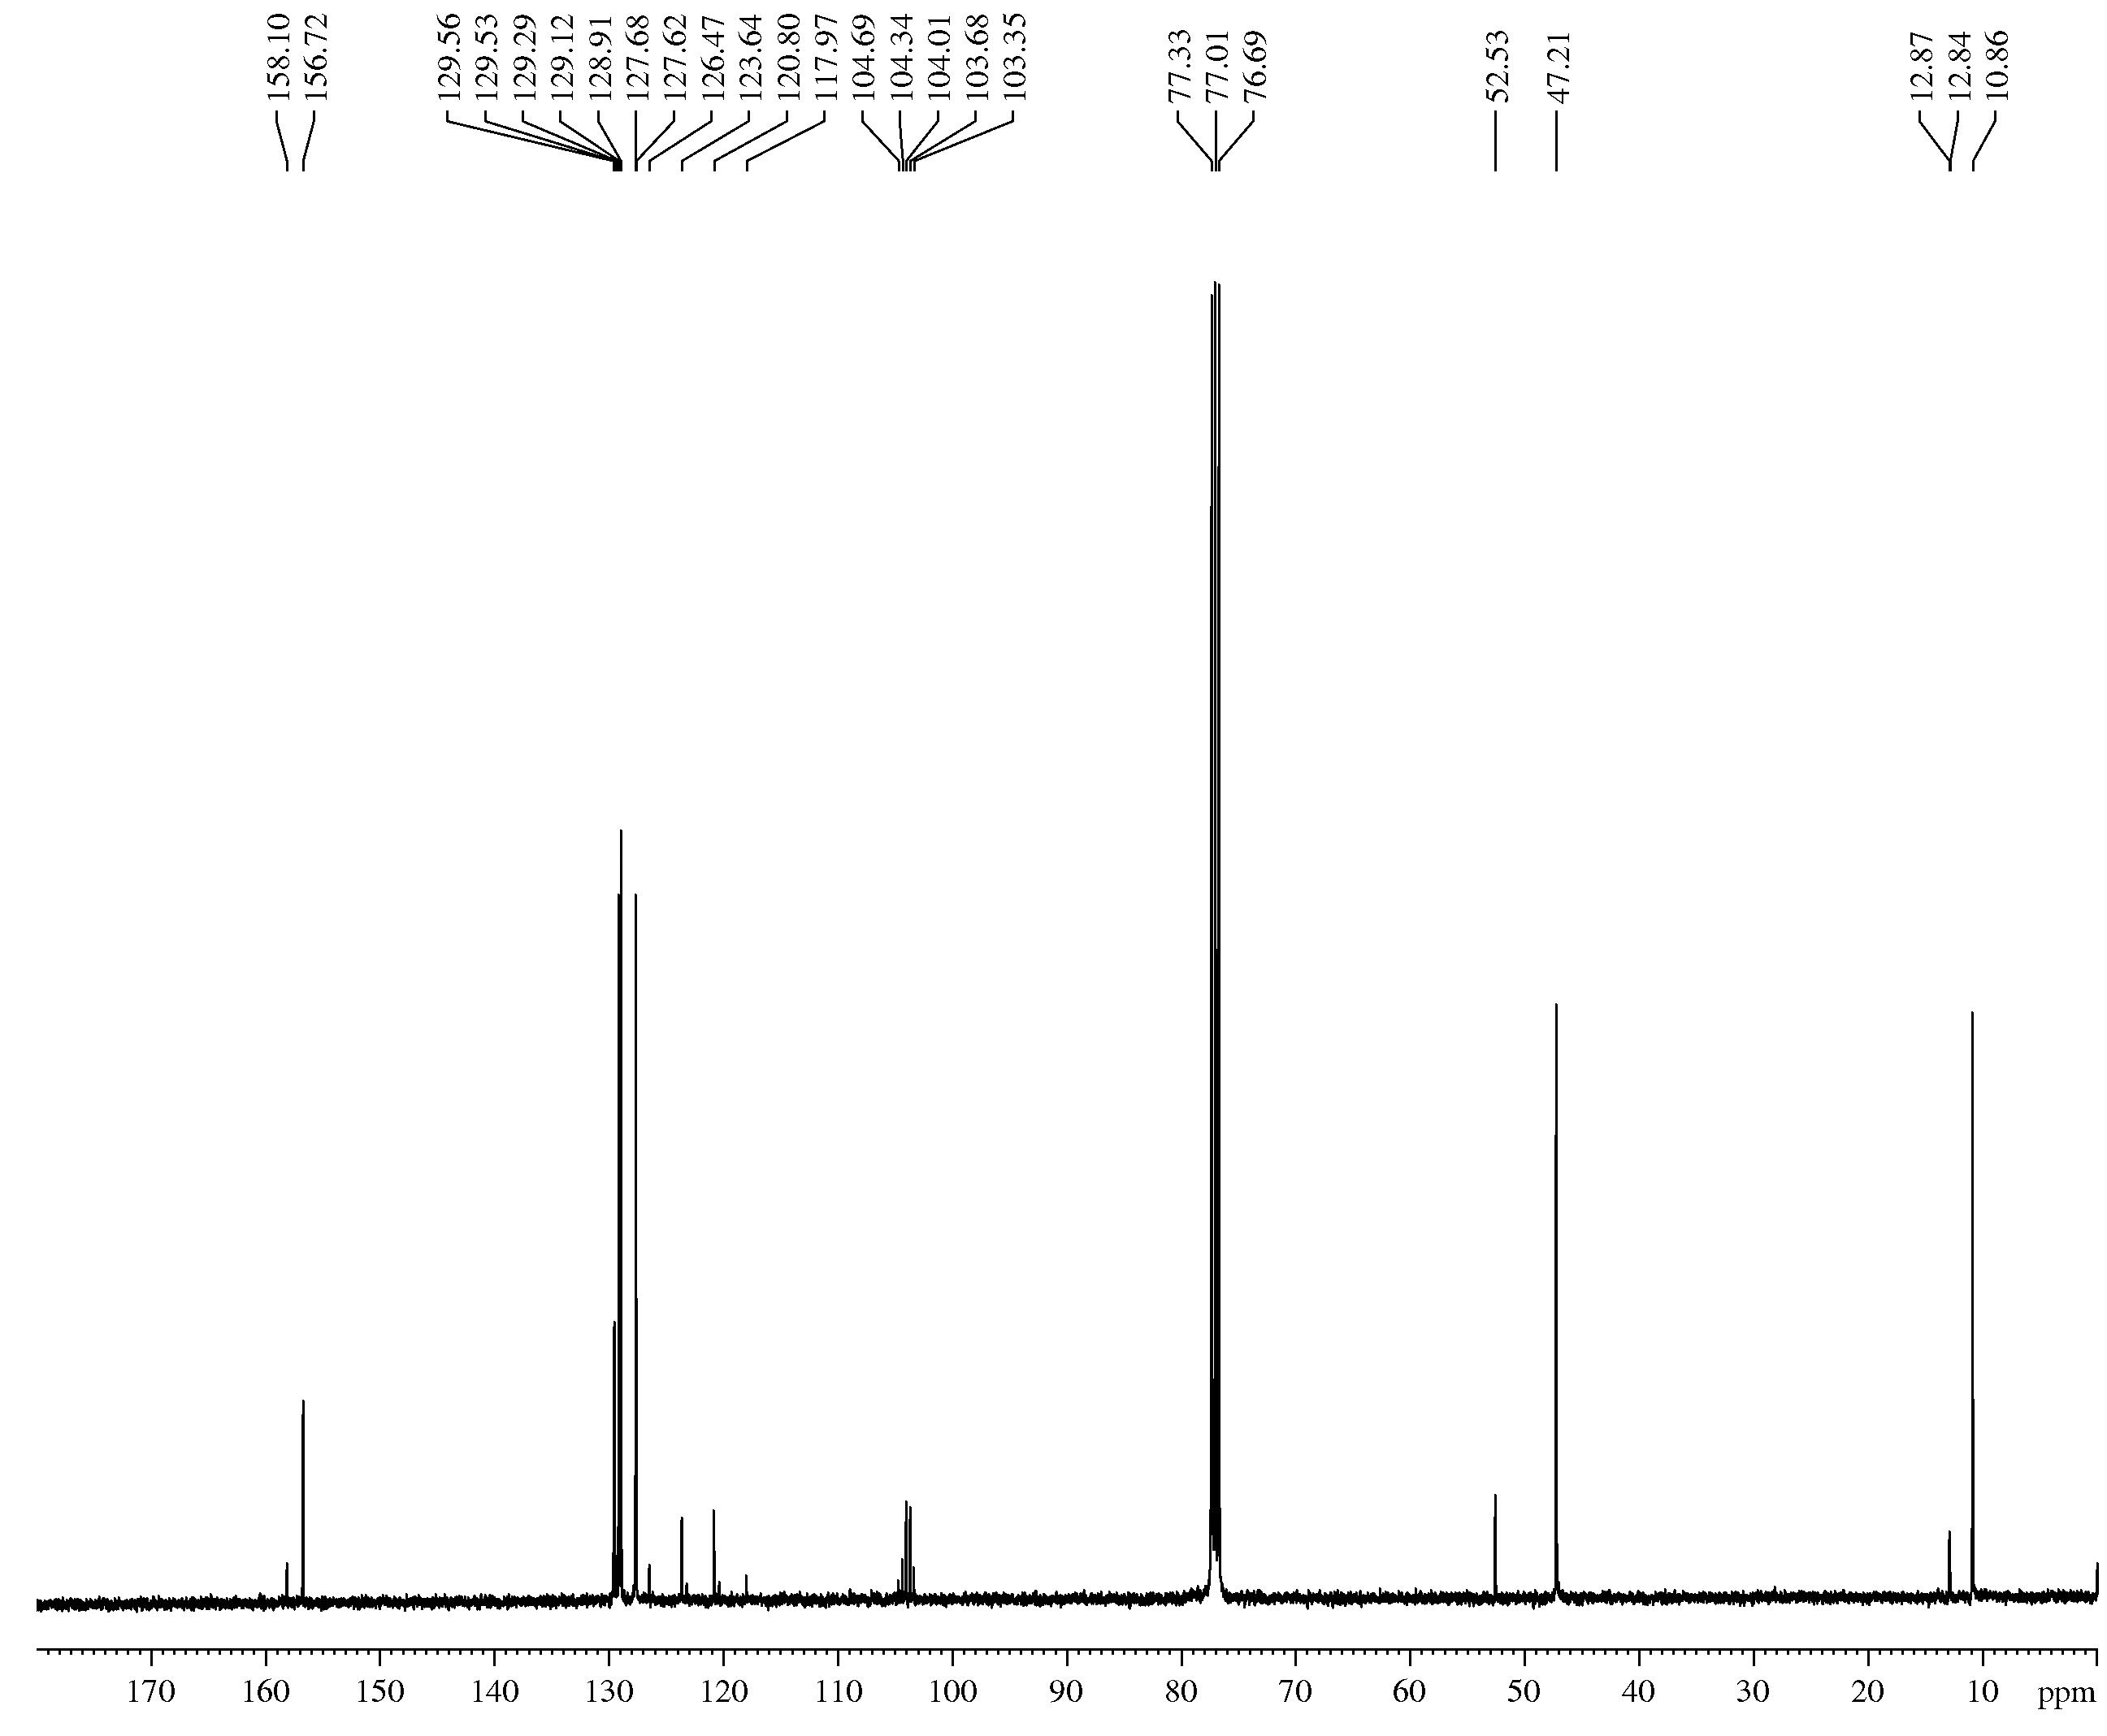


**Figure S8.** 13C NMR spectrum (100.62 MHz, CDCl3) of 5-trifluoromethyl-5-hydroxy-4-methyl-3-(thien-2-yl)-4,5-dihydroisoxazole(**4**), a diasteroisomeric mixture.


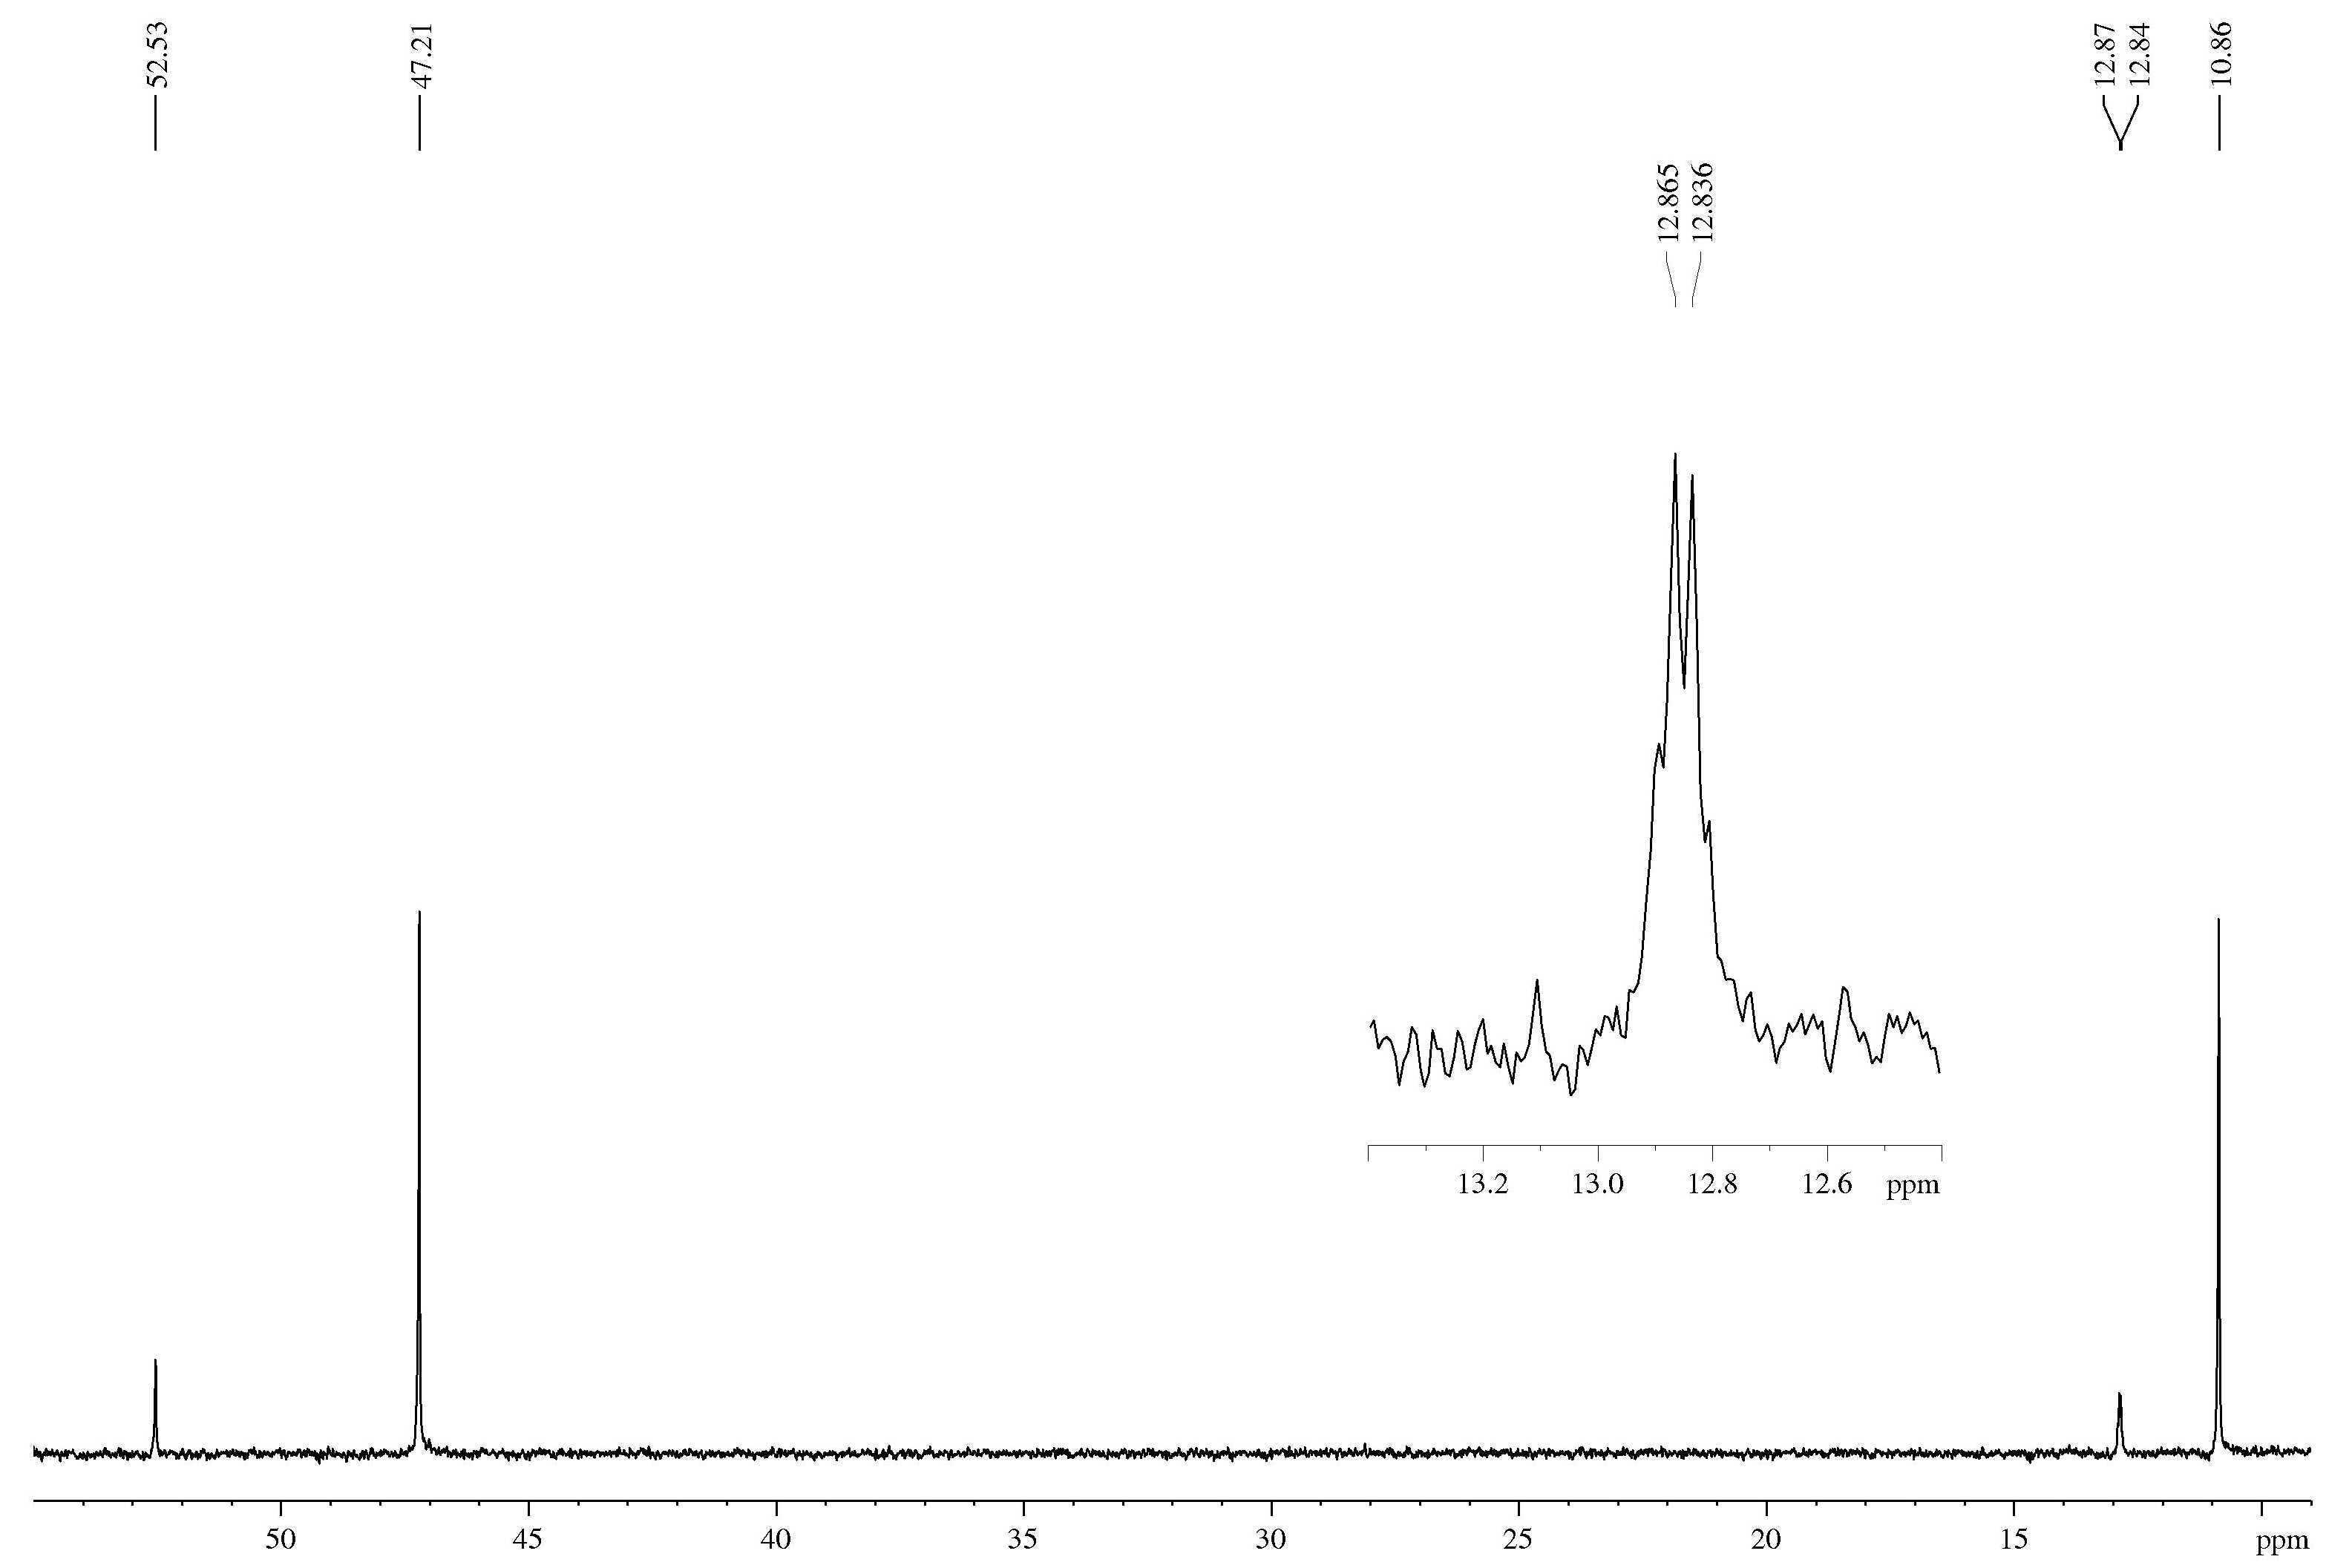


**Figure S9.** 13C NMR spectrum (100.62 MHz, CDCl3) of 5-trifluoromethyl-5-hydroxy-4-methyl-3-(thien-2-yl)-4,5-dihydroisoxazole(**4**), a diasteroisomeric mixture, expanded

between 10-55 ppm.


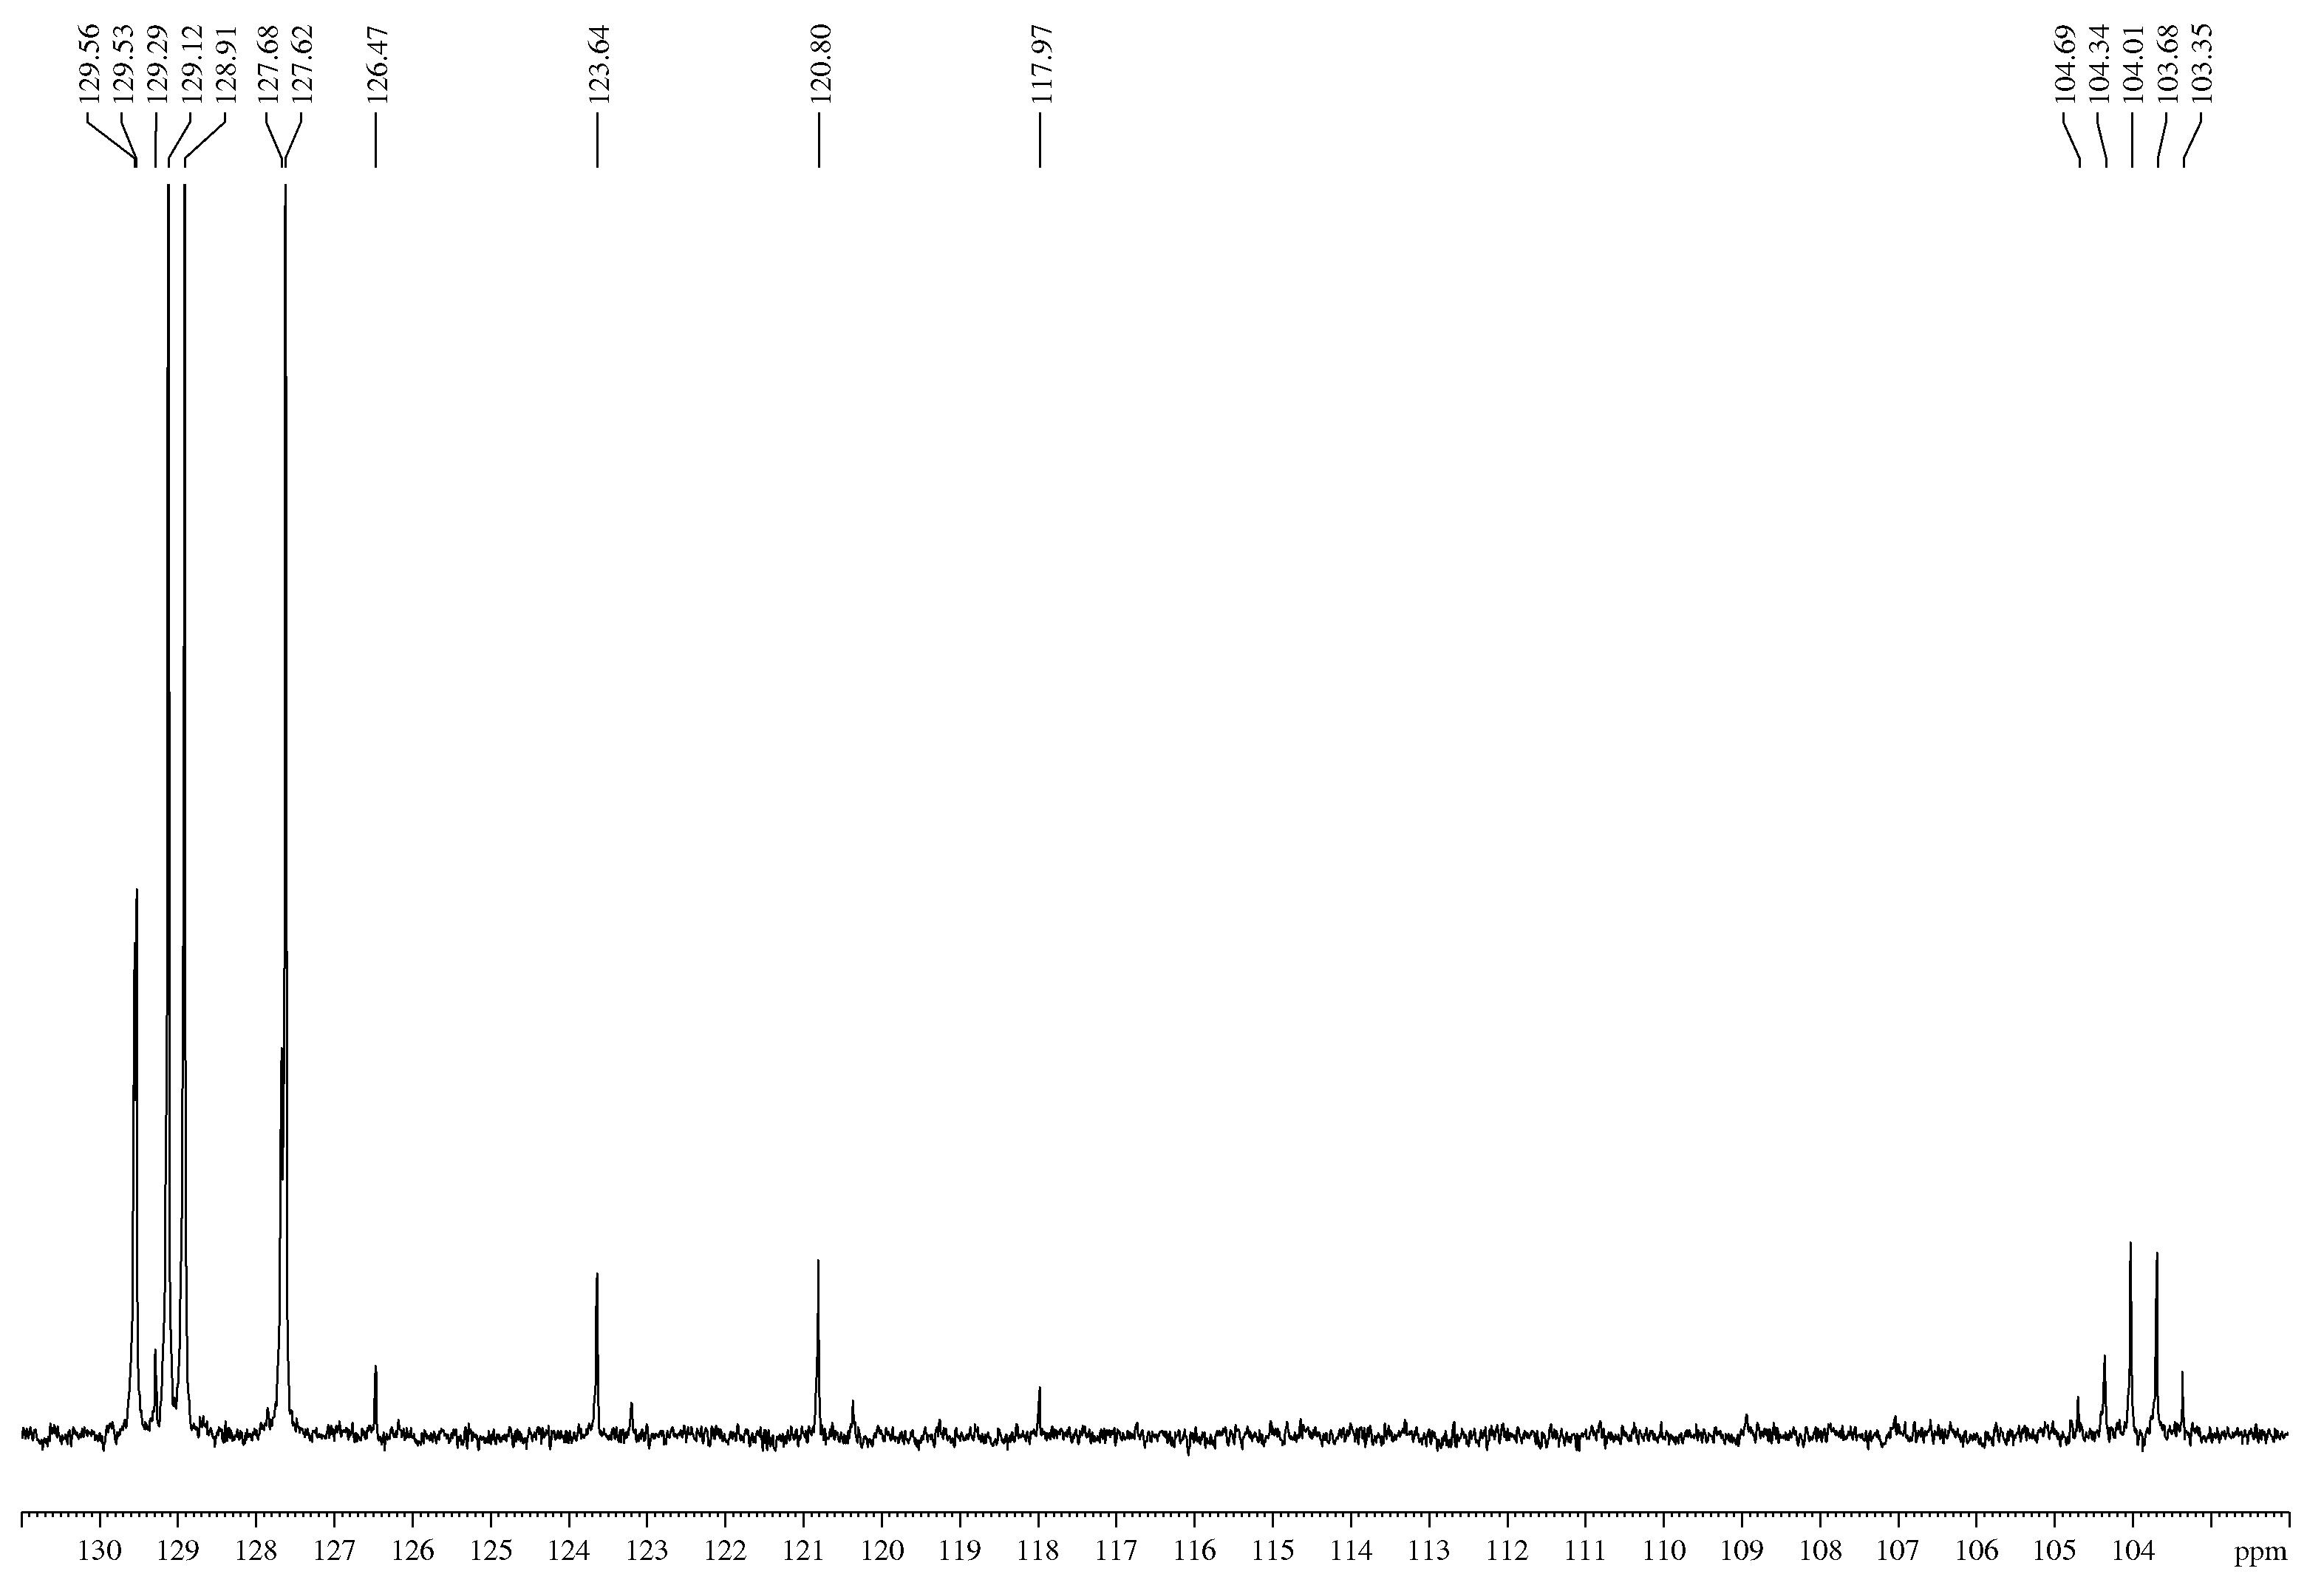


**Figure S10.** 13C NMR spectrum (100.62 MHz, CDCl3) of 5-trifluoromethyl-5-hydroxy-4-methyl-3-(thien-2-yl)-4,5-dihydroisoxazole(**4**), a diasteroisomeric mixture, expanded

between 102-131 ppm.


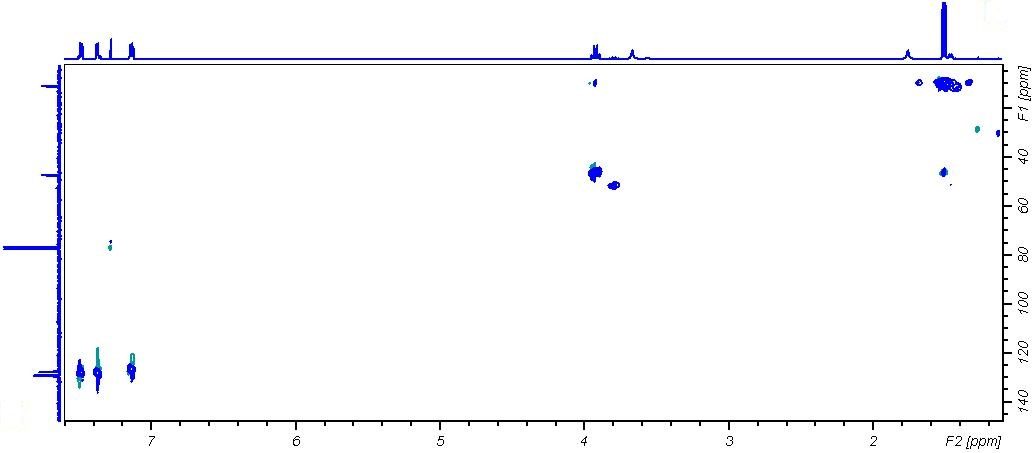


**Figure S11.** 2D HSQC NMR spectrum (CDCl3) of the diasteroisomeric mixture 5-trifluoromethyl-5-hydroxy-4-methyl-3-(thien-2-yl)-4,5-dihydroisoxazole(**4a/4b**).


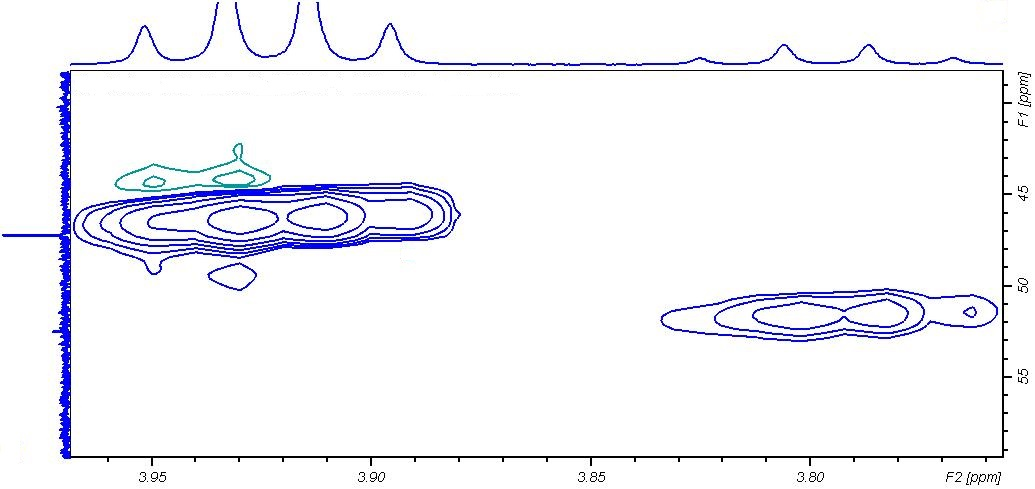


**Figure S12.** 2D HSQC NMR spectrum (CDCl3) of the diasteroisomeric mixture 5-trifluoromethyl-5-hydroxy-4-methyl-3-(thien-2-yl)-4,5-dihydroisoxazole(**4a/4b**), expanded

in the H-4 region.


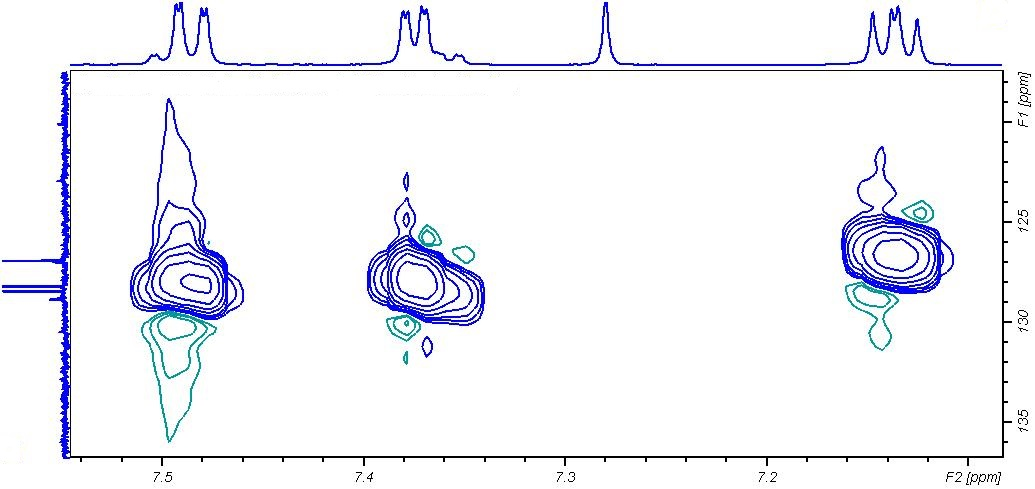


**Figure S13.** 2D HSQC NMR spectrum (CDCl3) of the diasteroisomeric mixture 5-trifluoromethyl-5-hydroxy-4-methyl-3-(thien-2-yl)-4,5-dihydroisoxazole(**4a/4b**), expanded

in the thien-2-yl region.


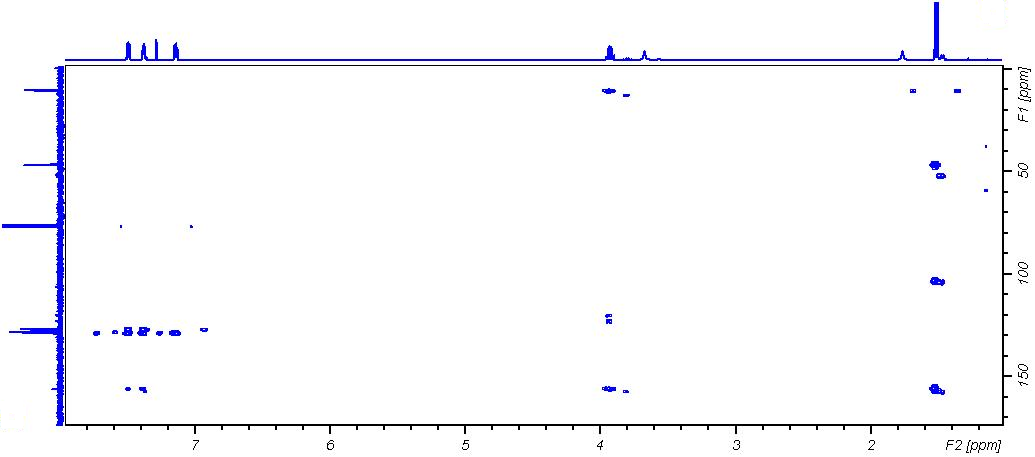


**Figure S14.** 2D HMBC NMR spectrum (CDCl3) of the diasteroisomeric mixture 5-trifluoromethyl-5-hydroxy-4-methyl-3-(thien-2-yl)-4,5-dihydroisoxazole(**4a/4b**).


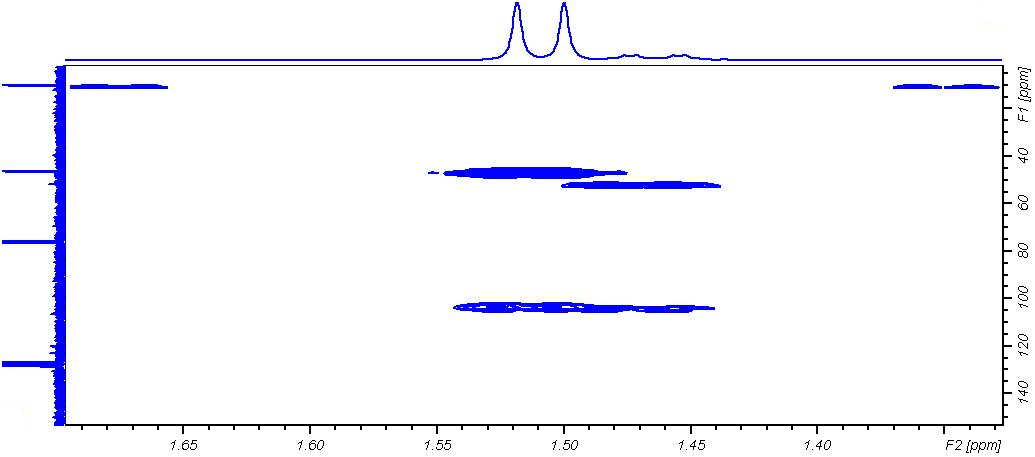


**Figure S15.** 2D HMBC NMR spectrum (CDCl3) of the diasteroisomeric mixture 5-trifluoromethyl-5-hydroxy-4-methyl-3-(thien-2-yl)-4,5-dihydroisoxazole(**4a/4b**), expanded

in the methyl-4 region.


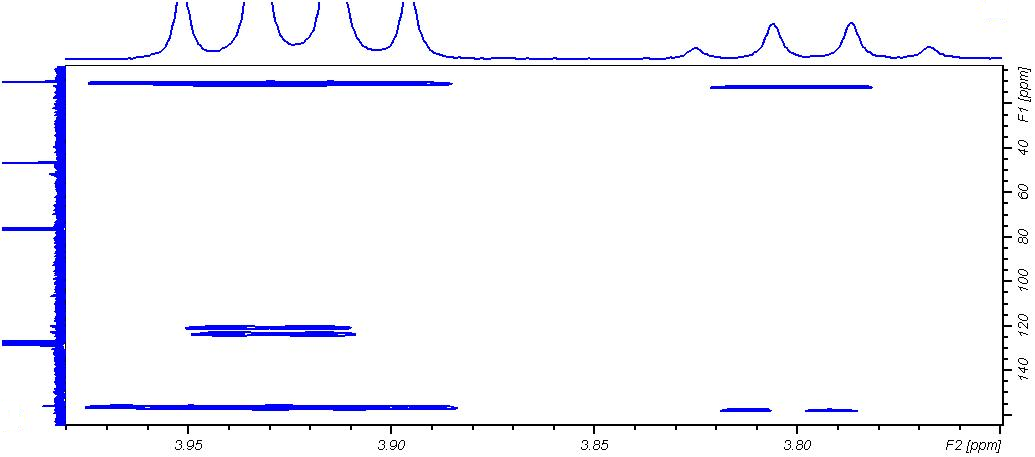


**Figure S16.** 2D HMBC NMR spectrum (CDCl3) of the diasteroisomeric mixture 5-trifluoromethyl-5-hydroxy-4-methyl-3-(thien-2-yl)-4,5-dihydroisoxazole(**4a/4b**), expanded

in the H-4 region.

MS

MS2

**Figure S17.** High Resolution Mass Spectrum of diasteroisomeric mixture 5-trifluoromethyl-5-hydroxy-4-methyl-3-(thien-2-yl)-4,5-dihydroisoxazole(**4**).


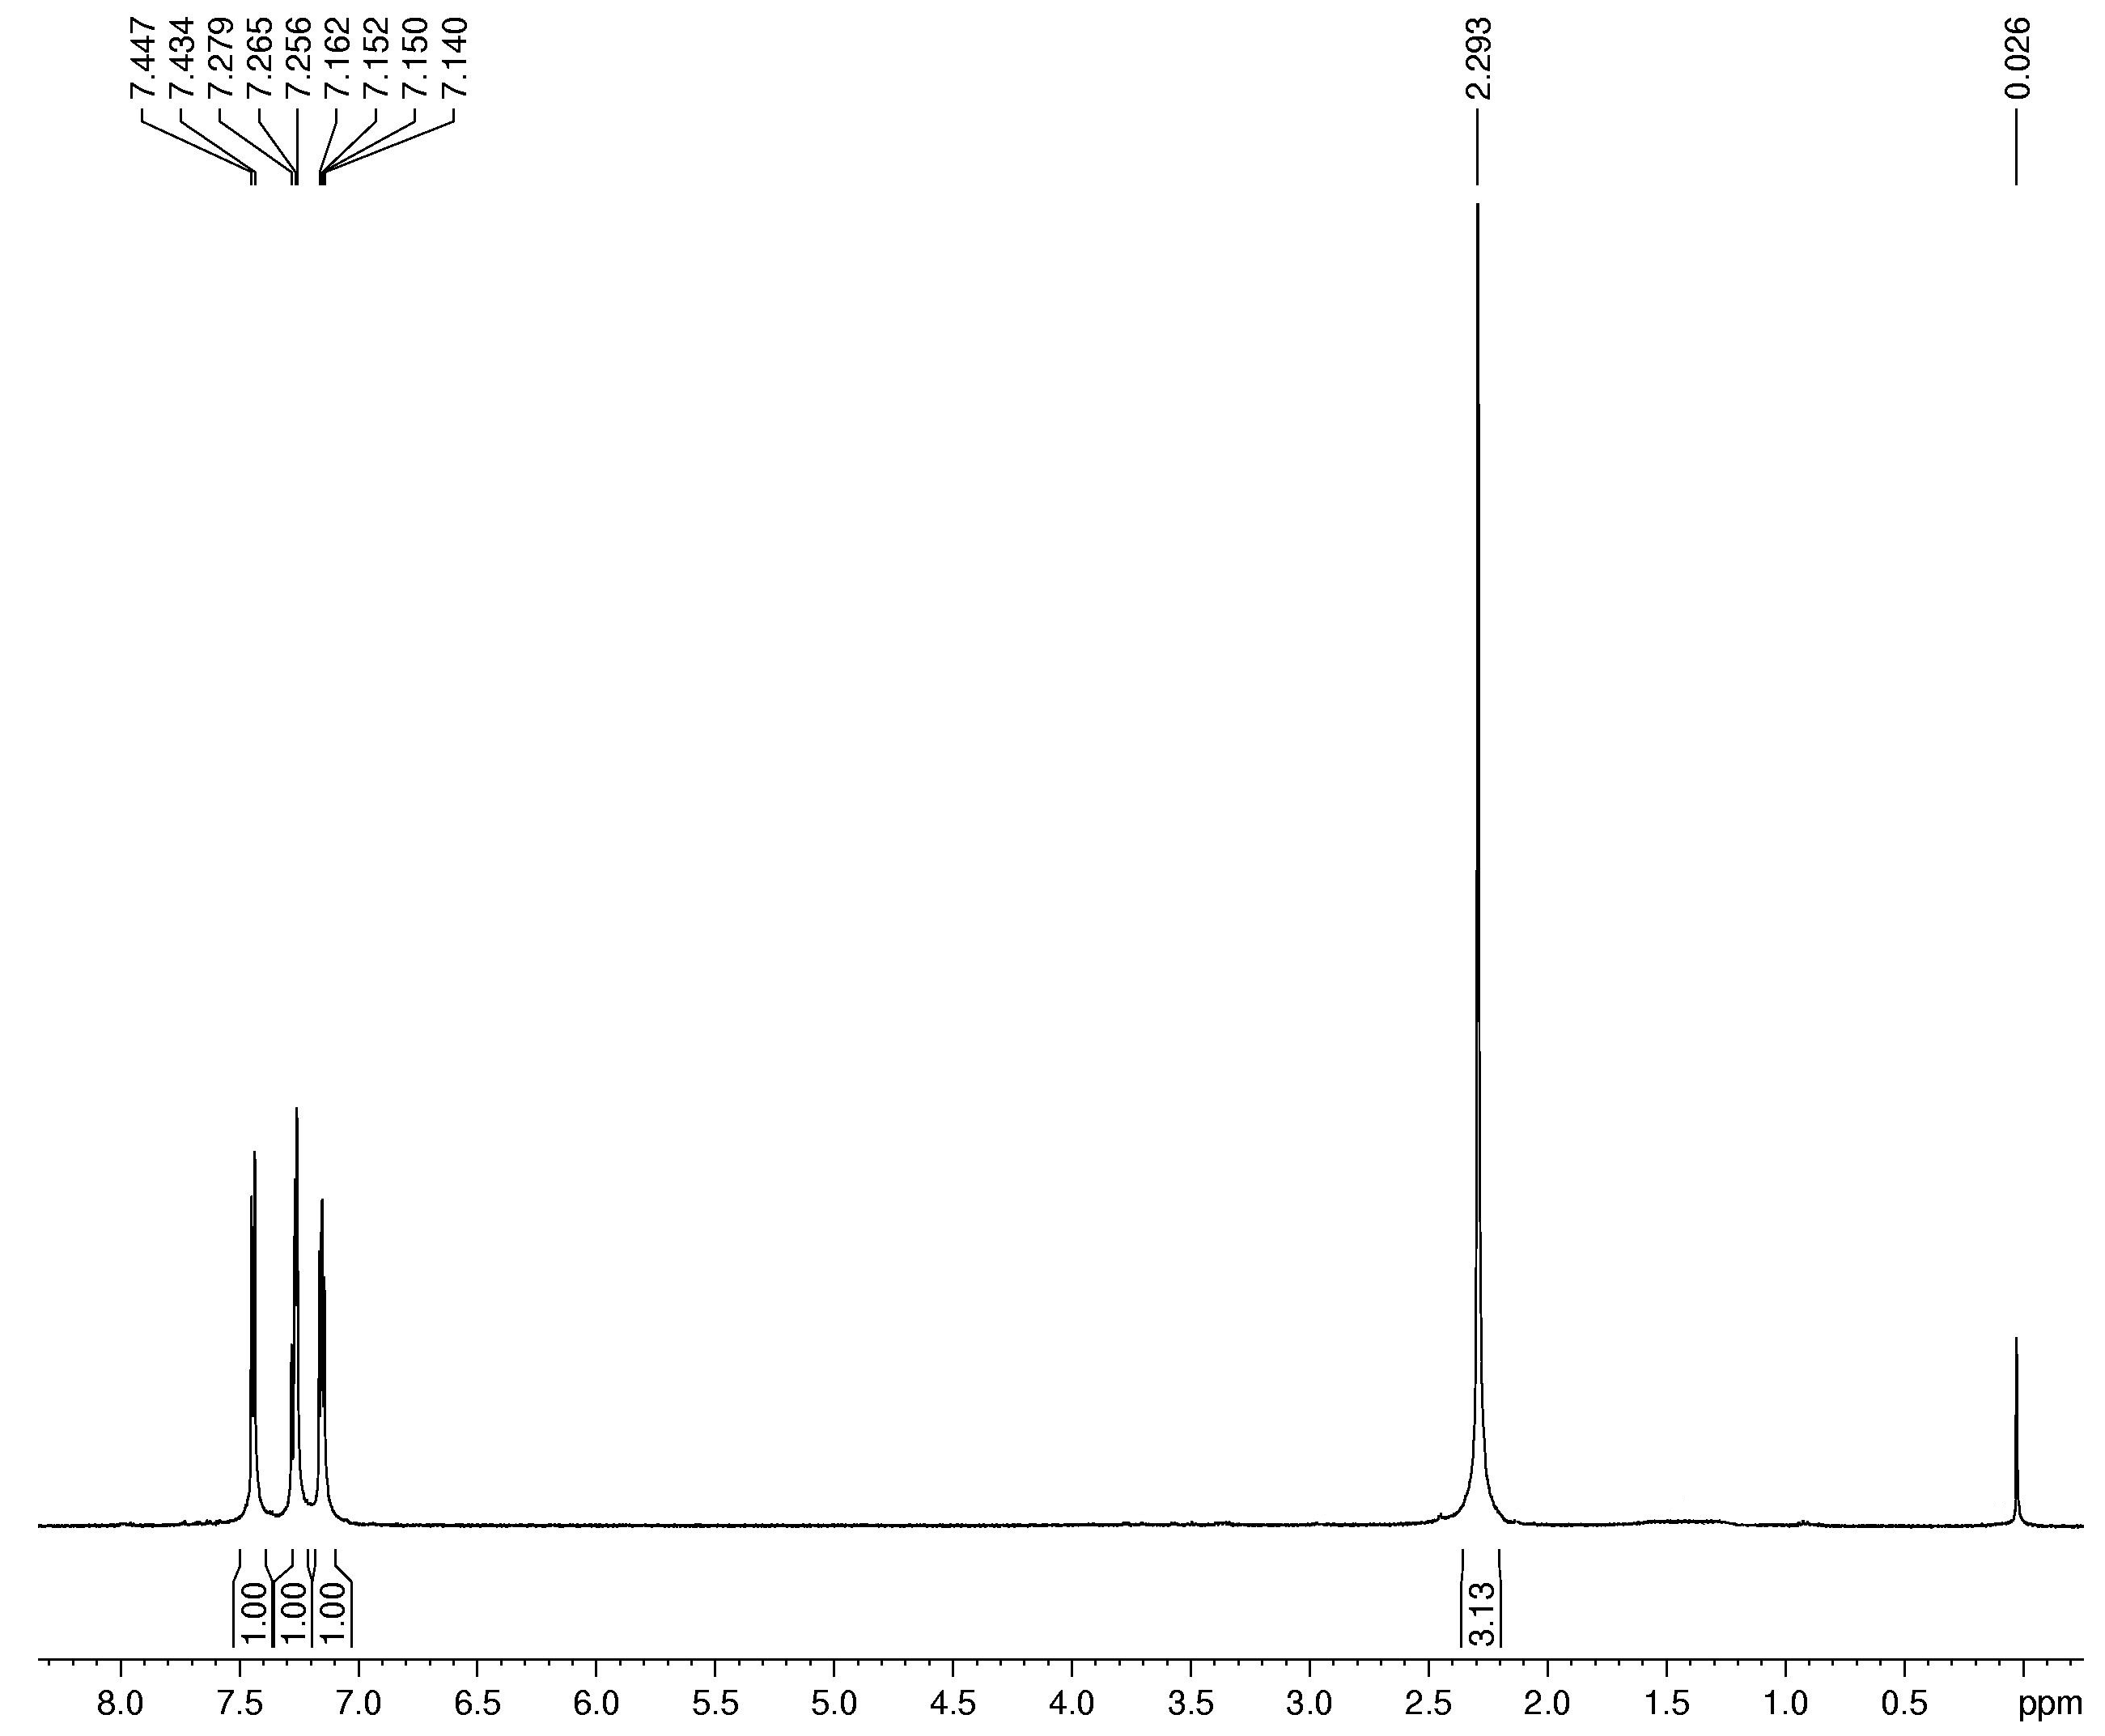


**Figure S18.** 1H NMR spectrum (400.13 MHz, CDCl3) of 5(3)-trifluoromethyl-4-methyl-3(5)-(thien-2-yl)-1*H*-pyrazole(**5**).


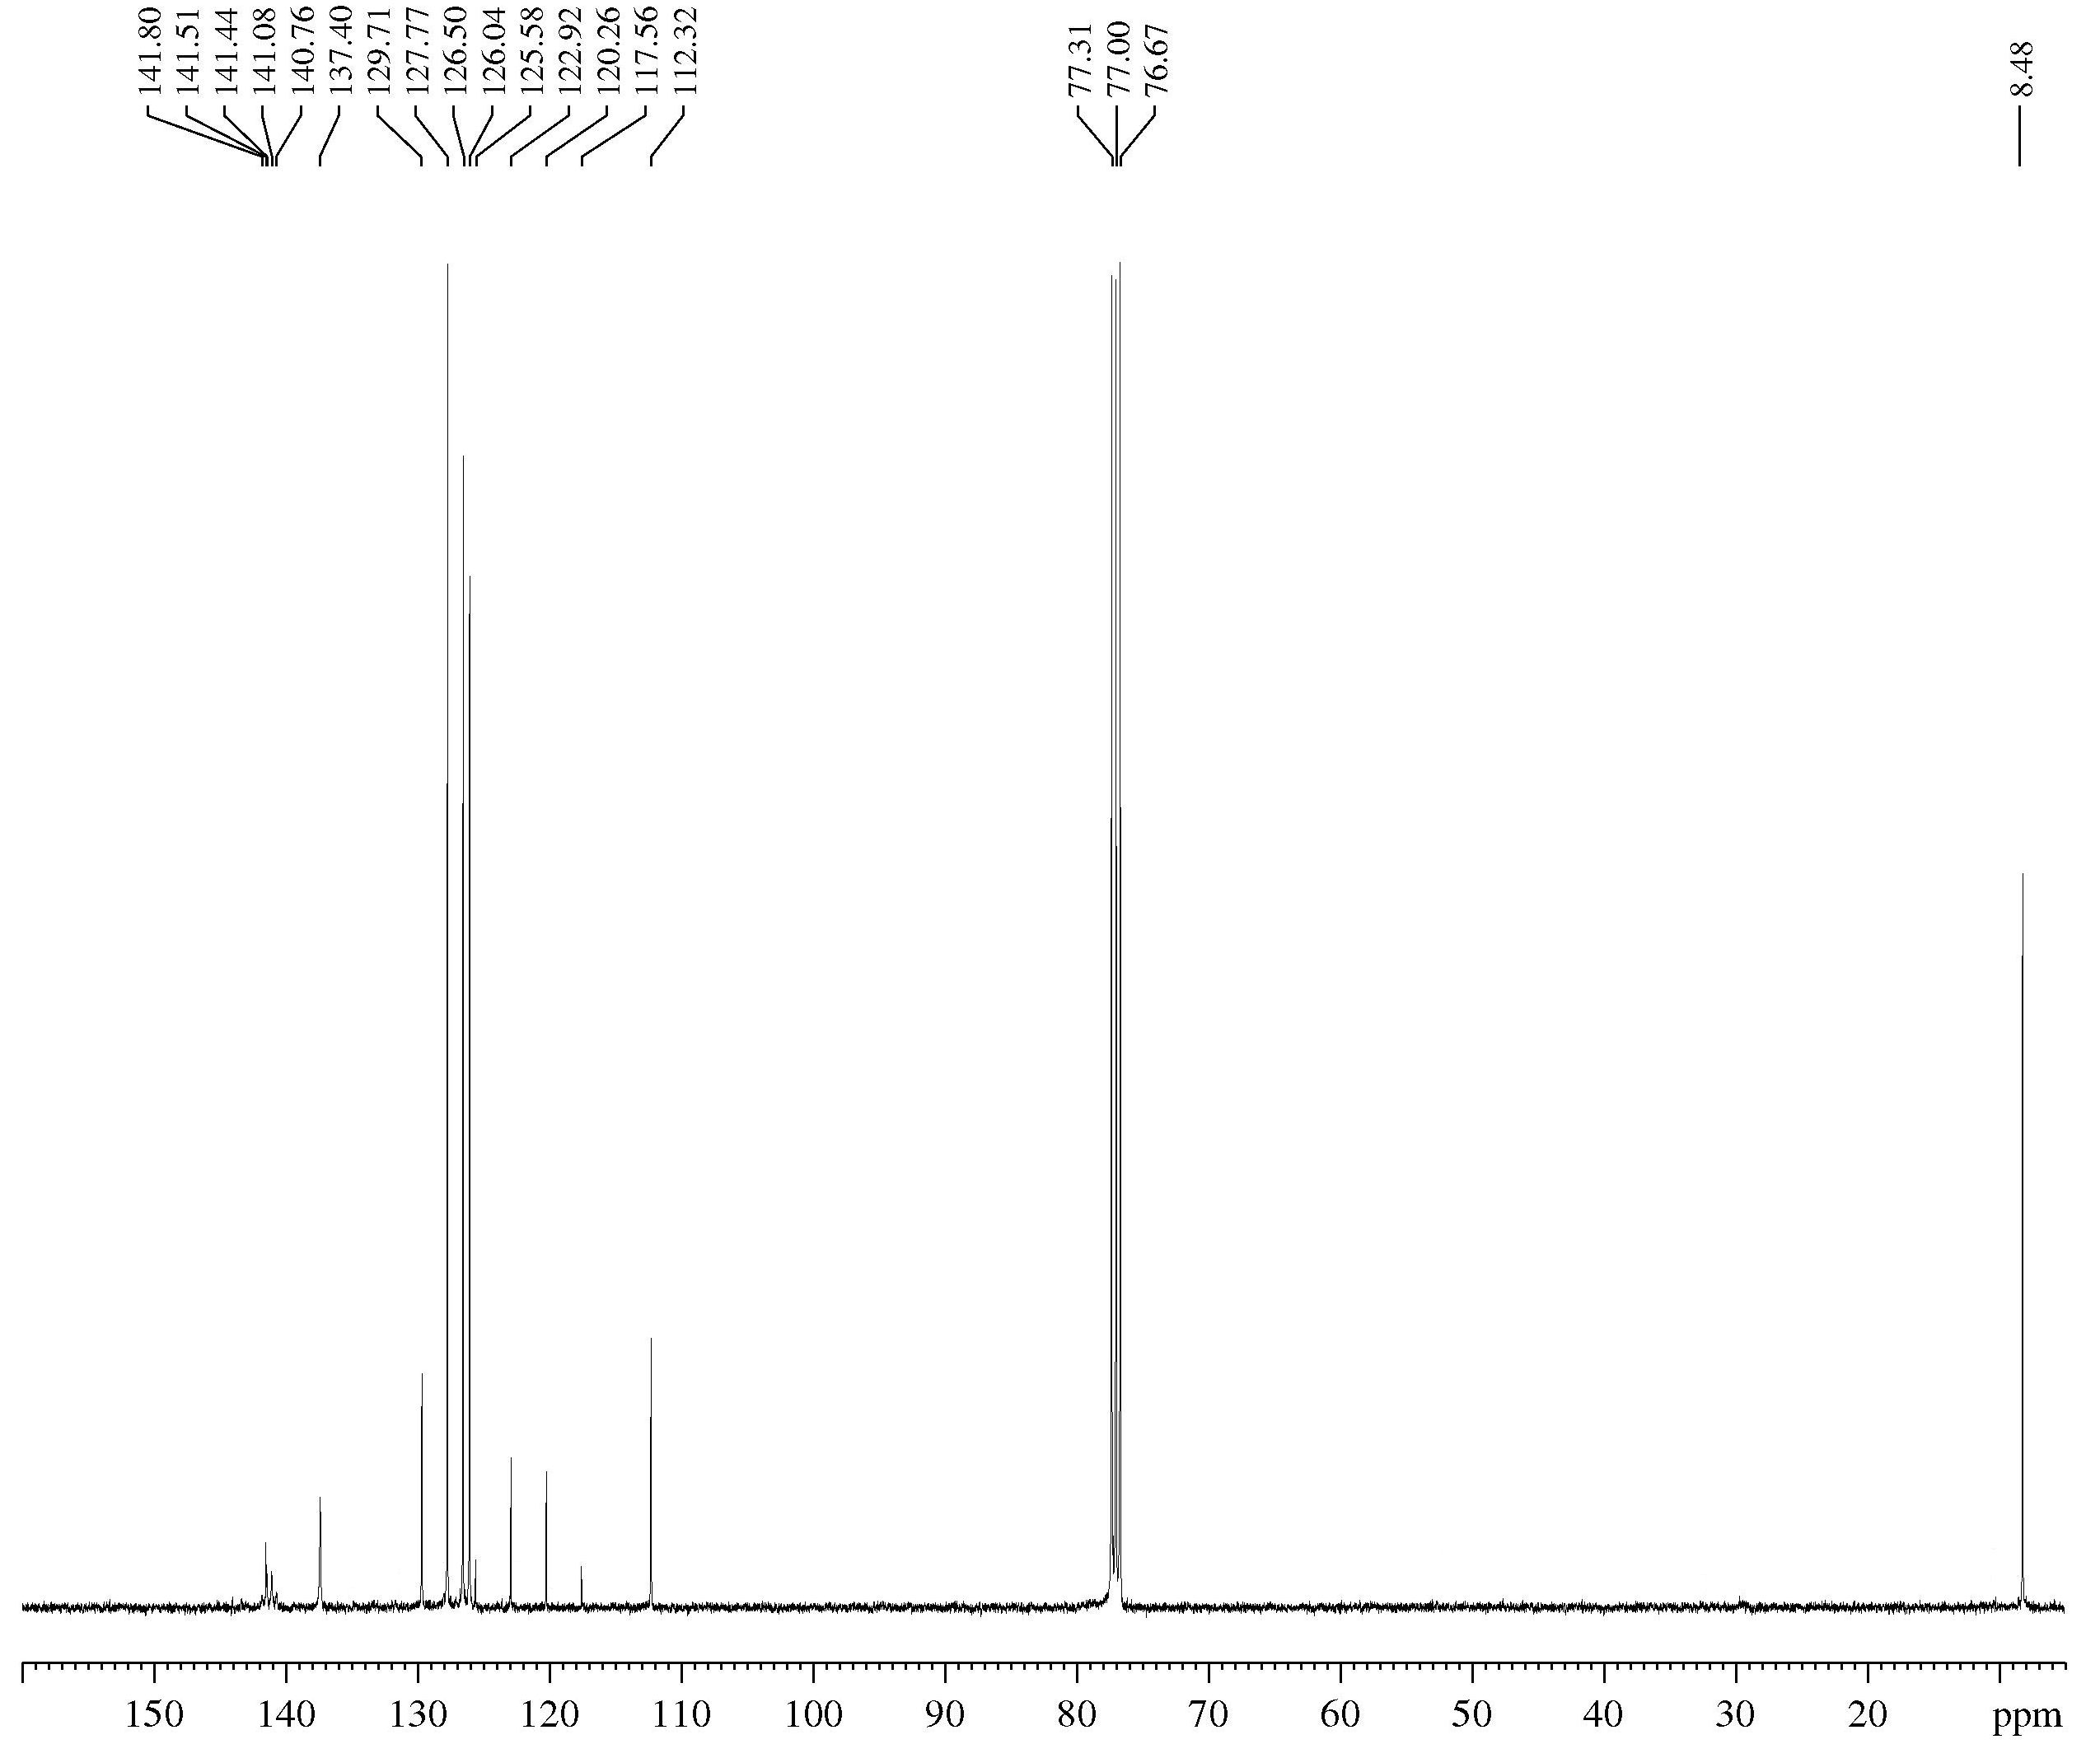


**Figure S19.** 13C NMR spectrum (100.62 MHz, CDCl3) of 5(3)-trifluoromethyl-4-methyl-3(5)-(thien-2-yl)-1*H*-pyrazole(**5**).


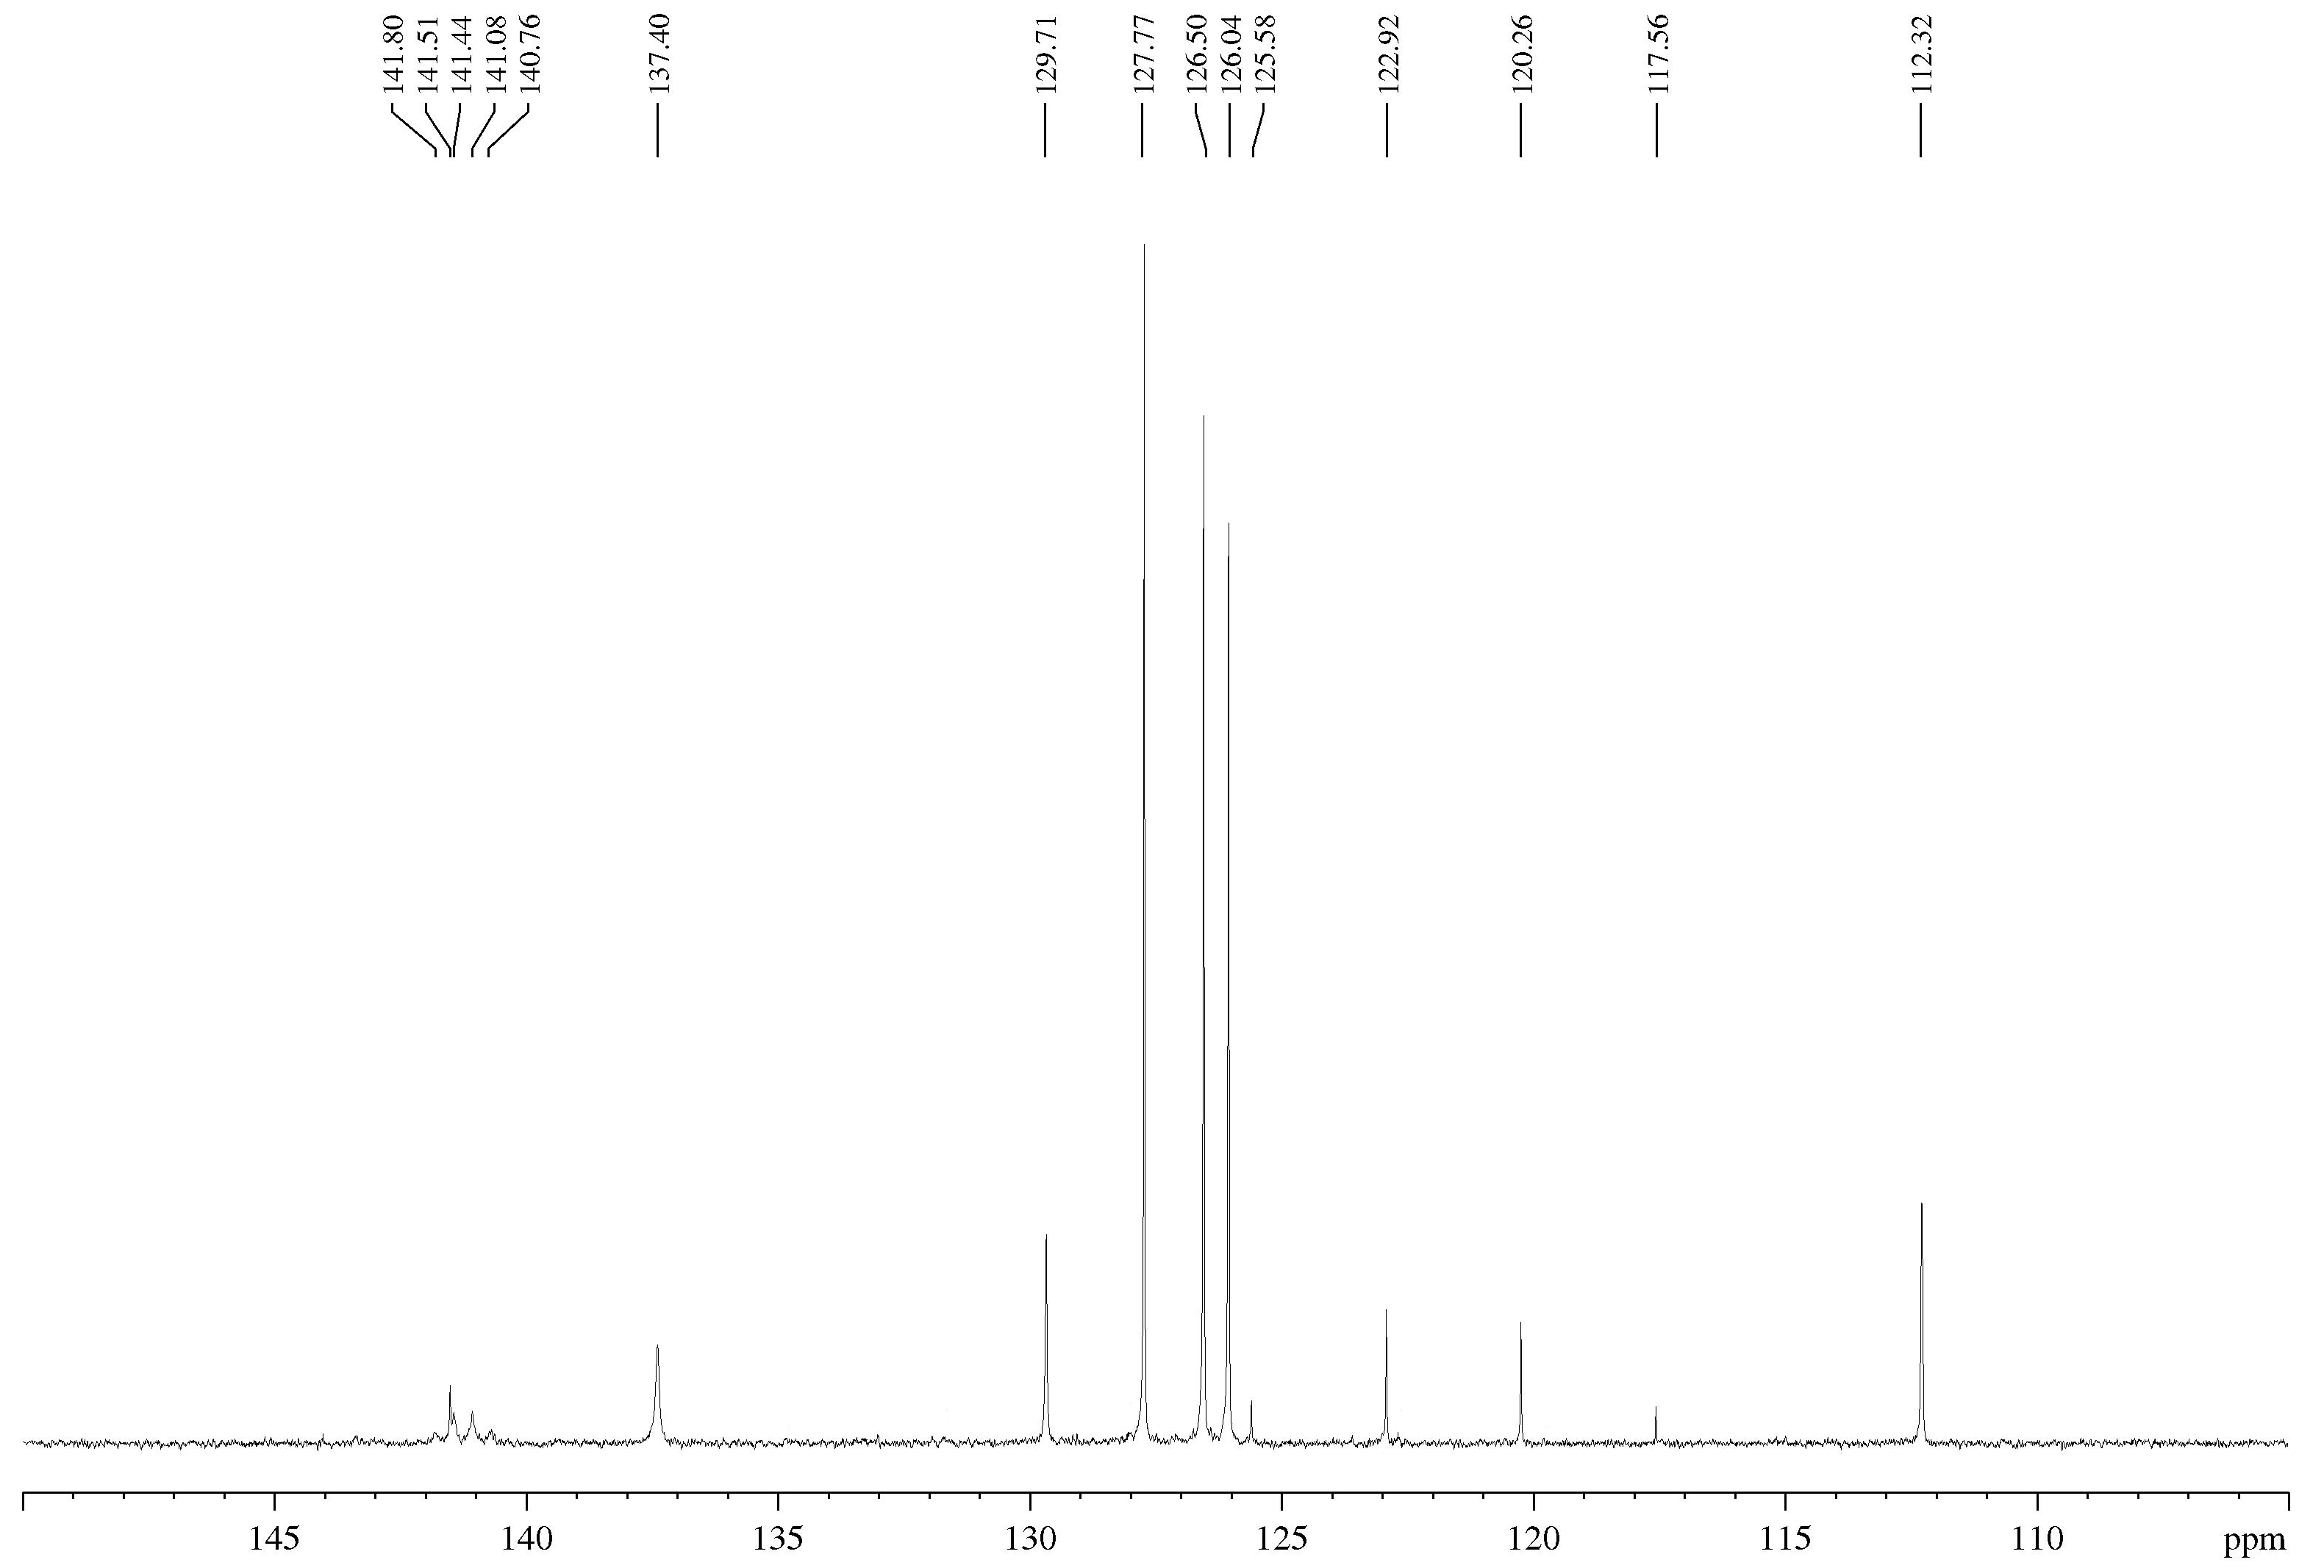


**Figure S20.** 13C NMR spectrum (100.62 MHz, CDCl3) of 5(3)-trifluoromethyl-4-methyl-3(5)-(thien-2-yl)-1*H*-pyrazole(**5**), expanded between 105-150 ppm.

MS

MS2

**Figure S21.** High resolution mas spectrum of 5(3)-trifluoromethyl-4-methyl-3(5)-(thien-2-yl)-1*H*-pyrazole(**5**).


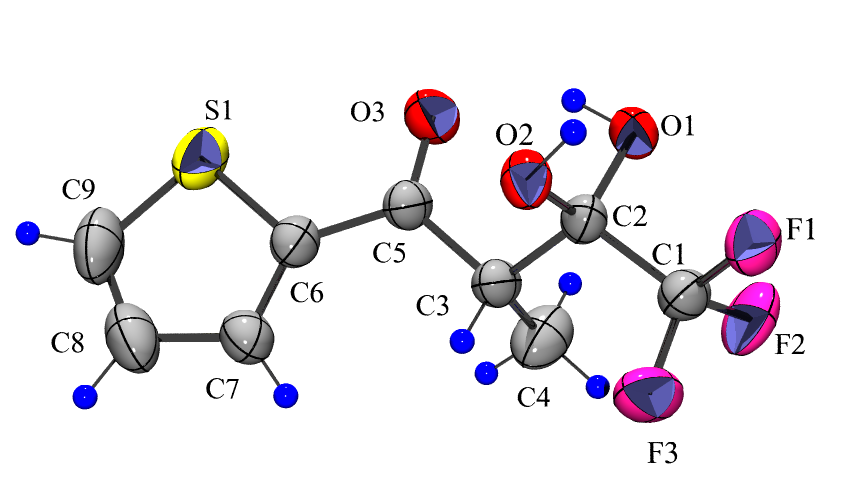


Figure S22. ORTEP drawing of 4,4,4-trifluoro-3,3-dihydroxy-2-methyl-1-(thien-2-yl)-1-butenone (3), showing all non-hydrogen atoms and atom-numbering scheme; 50% probability amplitude displacement ellipsoids are shown.


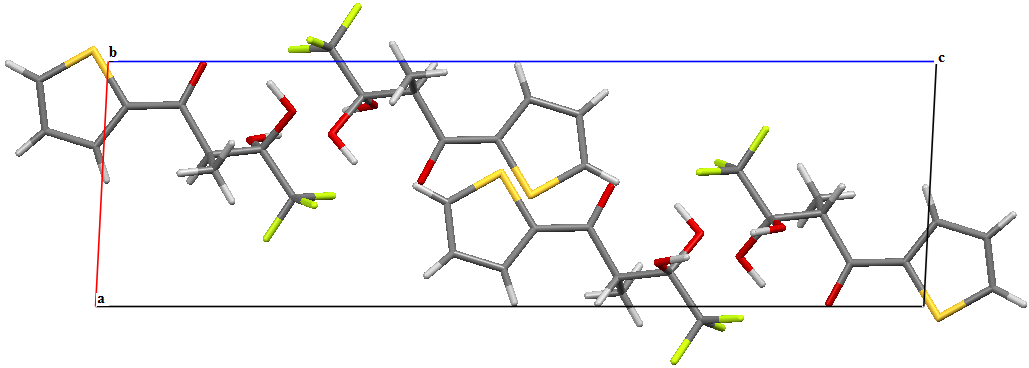


**Figure S23.** Crystalline supramolecular packing diagram of 4,4,4-trifluoro-3,3-dihydroxy-2-methyl-1-(thien-2-yl)-1-butenone(**3**), view along the *b*-axis.


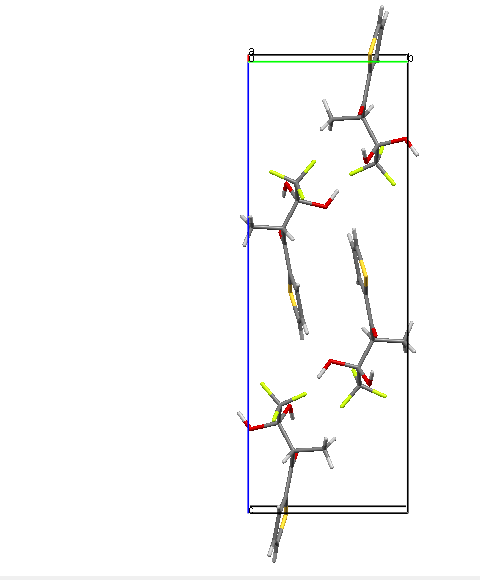


**Figure S24.** Crystalline supramolecular packing diagram of 4,4,4-trifluoro-3,3-dihydroxy-2-methyl-1-(thien-2-yl)-1-butenone(**3**), view along the *a*-axis.


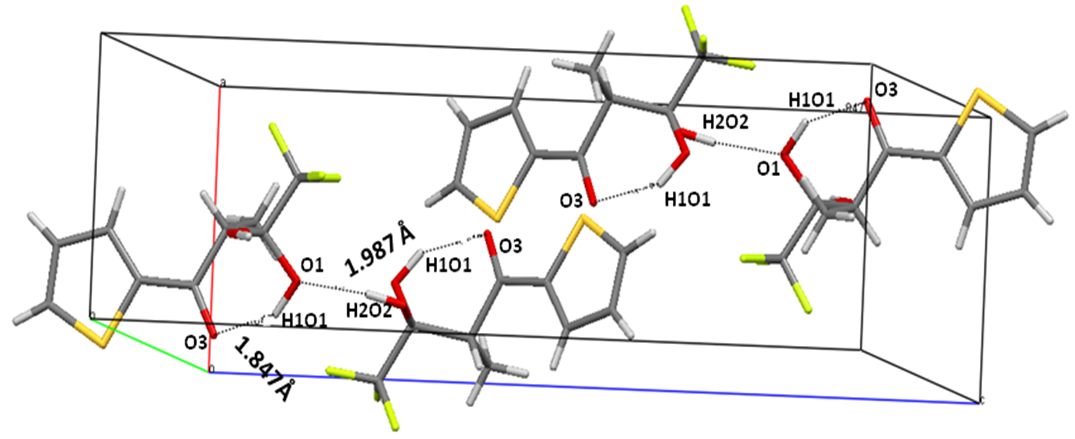


**Figure S25.** Partial view of the infinite 3D-structure formed by the different units of **3**, showing intra and intermolecular hydrogen bonds as dashed lines.

Table S1. Crystallographic data and structure refinement parameters for 4,4,4-trifluoro-3,3-dihydroxy-2-methyl-1-(thien-2-yl)butan-1-one (3).

| Chemical formula | C9 H9 F3 O3 S |
| --- | --- |
| Mass weight | 254.22 |
| Temperature | 293 K |
| Wavelenght | 0.71073 Å |
| Crystal system | Monoclinic |
| Space group | P 21/n |
| Unit cell dimensions | a = 6.4528(4) Å α = 90.000(0)  b = 7.6982(4) Å β = 92.955(3)°  c = 21.7838(13) Å  = 90.000(0) |
| Volume | 1080.67(11) Å3 |
| Z | 4 |
| Density (calculated) | 1.563 mg/m3 |
| F(000) | 520 |
| Crystal size | 0.45 x 0.33 x 0.27 mm3 |
| Theta range for data collection | 3.24 to 28.20° |
| Index ranges | -8  h  8, -10 k 10, -28  l 28 |
| Reflections collected | 25372 |
| Independent reflections | 2636 [R(int) = 0.0597] |
| Completeness to theta = 27.27o | 98.9 % |
| Refinement method | Full-matrix least-squares on F2 |
| Computinga | COLLECT1, HKL Denzo and Scalepack2, SHELXS-973, SHELXL-97 4 |
| Data/ restrains/ parameters | 2636 / 0 / 145 |
| Goodness-of-fit on F2 | 1.059 |

**Table S2.** Atomic coordinates (x104) and equivalent isotropic displacement parameters (Å2x103). U(eq) is defined as one third of trace of the orthogonalized U*ij* tensor.

| Atom | x | y | z | U(eq) |
| --- | --- | --- | --- | --- |
| C(1) | -5562(3) | 1992(3) | -2324(1) | 43(1) |
| C(2) | -3580(3) | 1897(2) | -1906(1) | 36(1) |
| C(3) | -3809(3) | 2830(2) | -1288(1) | 40(1) |
| C(4) | -4411(4) | 4760(3) | -1342(1) | 66(1) |
| C(5) | -1769(3) | 2715(2) | -908(1) | 41(1) |
| C(6) | -1824(3) | 2361(2) | -253(1) | 43(1) |
| C(7) | -3465(3) | 1950(3) | 100(1) | 50(1) |
| C(8) | -2831(5) | 1624(3) | 718(1) | 69(1) |
| C(9) | -762(5) | 1796(4) | 822(1) | 75(1) |
| F(1) | -5481(2) | 877(2) | -2793(1) | 57(1) |
| F(2) | -5874(2) | 3556(2) | -2576(1) | 68(1) |
| F(3) | -7230(2) | 1595(2) | -2021(1) | 66(1) |
| O(1) | -2033(2) | 2599(2) | -2259(1) | 45(1) |
| O(2) | -3210(2) | 154(2) | -1757(1) | 45(1) |
| O(3) | -119(2) | 2983(2) | -1147(1) | 61(1) |
| S(1) | 470(1) | 2363(1) | 185(1) | 66(1) |

**Table S3**. Bond lengths (Å) for **3**.

| Atom 1 | Atom 2 | Bond length |
| --- | --- | --- |
| C(1) | F(3) | 1.328(2) |
| C(1) | F(2) | 1.333(2) |
| C(1) | F(1) | 1.336(2) |
| C(1) | C(2) | 1.533(2) |
| C(2) | O(2) | 1.398(2) |
| C(2) | O(1) | 1.400(2) |
| C(2) | C(3) | 1.540(2) |
| C(3) | C(5) | 1.521(2) |
| C(3) | C(4) | 1.538(3) |
| C(5) | O(3) | 1.225(2) |
| C(5) | C(6) | 1.455(3) |
| C(6) | C(7) | 1.377(3) |
| C(6) | S(1) | 1.7204(19) |
| C(7) | C(8) | 1.410(3) |
| C(8) | C(9) | 1.349(4) |
| C(9) | S(1) | 1.691(3) |

**Table S4**. Bond angles (º) for **3**.

| Atom 1 | Atom 2 | Atom 3 | angle (º) |
| --- | --- | --- | --- |
| F(3) | C(1) | F(2) | 107.64(16) |
| F(3) | C(1) | F(1) | 107.27(16) |
| F(2) | C(1) | F(1) | 106.11(15) |
| F(3) | C(1) | C(2) | 111.43(15) |
| F(2) | C(1) | C(2) | 113.00(16) |
| F(1) | C(1) | C(2) | 111.07(15) |
| O(2) | C(2) | O(1) | 112.32(14) |
| O(2) | C(2) | C(1) | 108.12(14) |
| O(1) | C(2) | C(1) | 104.55(14) |
| O(2) | C(2) | C(3) | 105.54(14) |
| O(1) | C(2) | C(3) | 113.82(14) |
| C(1) | C(2) | C(3) | 112.52(14) |
| C(5) | C(3) | C(4) | 107.82(16) |
| C(5) | C(3) | C(2) | 109.18(14) |
| C(4) | C(3) | C(2) | 114.77(16) |
| O(3) | C(5) | C(6) | 120.84(17) |
| O(3) | C(5) | C(3) | 120.44(17) |
| C(6) | C(5) | C(3) | 118.66(16) |
| C(7) | C(6) | C(5) | 130.50(17) |
| C(7) | C(6) | S(1) | 110.74(14) |
| C(5) | C(6) | S(1) | 118.72(14) |
| C(6) | C(7) | C(8) | 112.4(2) |
| C(9) | C(8) | C(7) | 112.2(2) |
| C(8) | C(9) | S(1) | 113.06(18) |
| C(9) | S(1) | C(6) | 91.57(12) |

**Table S5**. Hydrogens coordinates (x 104) and equivalent isotropic displacement parameters (Å2 x 103).

| Atom | x | Y | z | U(eq) |
| --- | --- | --- | --- | --- |
| H(3) | -4877 | 2227 | -1065 | 48 |
| H(4A) | -5702 | 4868 | -1578 | 99 |
| H(4B) | -3348 | 5382 | -1542 | 99 |
| H(4C) | -4559 | 5233 | -939 | 99 |
| H(7) | -4837 | 1894 | -52 | 59 |
| H(8) | -3735 | 1325 | 1020 | 82 |
| H(9) | -84 | 1621 | 1204 | 90 |
| H(1O1) | -916 | 2785 | -1970 | 68 |
| H(2O2) | -3000 | -564 | -2100 | 67 |

**Table S6**. Torsion angles [o] for **3**.

| Atom 1 | Atom 2 | Atom 3 | Atom 4 | Angle (º) |
| --- | --- | --- | --- | --- |
| F(3) | C(1) | C(2) | O(2) | 69.01(19) |
| F(2) | C(1) | C(2) | O(2) | -169.63(15) |
| F(1) | C(1) | C(2) | O(2) | -50.52(19) |
| F(3) | C(1) | C(2) | O(1) | -171.14(15) |
| F(2) | C(1) | C(2) | O(1) | -49.78(19) |
| F(1) | C(1) | C(2) | O(1) | 69.33(19) |
| F(3) | C(1) | C(2) | C(3) | -47.1(2) |
| F(2) | C(1) | C(2) | C(3) | 74.2(2) |
| F(1) | C(1) | C(2) | C(3) | -166.67(15) |
| O(2) | C(2) | C(3) | C(5) | 63.71(18) |
| O(1) | C(2) | C(3) | C(5) | -59.90(19) |
| C(1) | C(2) | C(3) | C(5) | -178.60(15) |
| O(2) | C(2) | C(3) | C(4) | -175.14(16) |
| O(1) | C(2) | C(3) | C(4) | 61.2(2) |
| C(1) | C(2) | C(3) | C(4) | -57.5(2) |
| C(4) | C(3) | C(5) | O(3) | -81.0(2) |
| C(2) | C(3) | C(5) | O(3) | 44.3(2) |
| C(4) | C(3) | C(5) | C(6) | 96.2(2) |
| C(2) | C(3) | C(5) | C(6) | -138.53(17) |
| O(3) | C(5) | C(6) | C(7) | -176.6(2) |
| C(3) | C(5) | C(6) | C(7) | 6.2(3) |
| O(3) | C(5) | C(6) | S(1) | 1.1(3) |
| C(3) | C(5) | C(6) | S(1) | -176.04(13) |
| C(5) | C(6) | C(7) | C(8) | 177.2(2) |
| S(1) | C(6) | C(7) | C(8) | -0.7(2) |
| C(6) | C(7) | C(8) | C(9) | 0.2(3) |
| C(7) | C(8) | C(9) | S(1) | 0.4(3) |
| C(8) | C(9) | S(1) | C(6) | -0.7(2) |
| C(7) | C(6) | S(1) | C(9) | 0.77(17) |
| C(5) | C(6) | S(1) | C(9) | -177.39(17) |

**Table S7**. Hydrogen-bonding geometry for **3** (Å and º).

|  | D-H...A | d(D-H) (Å) | d(H...A) (Å) | d(D...A) (Å) | <(DHA)(º) |
| --- | --- | --- | --- | --- | --- |
| O1-H1O1...O3 | | 0.943(1) | 1.847(2) | 2.679(2) | 145.61(9) |
| O2-H2O2...O1 | | 0.945(1) | 1.987(1) | 2.919(2) | 168.17(9) |

Symmetry code 1/2-x,1/2+y,1/2-z

**Table S8.** Atomic displacement parameters (Å2) to **3**.

| Atom | U11 | U22 | U33 | U23 | U13 | U12 |
| --- | --- | --- | --- | --- | --- | --- |
| C(1) | 39(1) | 49(1) | 42(1) | -5(1) | -1(1) | 5(1) |
| C(2) | 37(1) | 37(1) | 35(1) | 2(1) | -1(1) | 2(1) |
| C(3) | 36(1) | 47(1) | 37(1) | -6(1) | 1(1) | 2(1) |
| C(4) | 73(2) | 56(1) | 67(1) | -20(1) | -14(1) | 21(1) |
| C(5) | 39(1) | 45(1) | 38(1) | -6(1) | -1(1) | 1(1) |
| C(6) | 47(1) | 42(1) | 39(1) | -6(1) | -2(1) | 6(1) |
| C(7) | 55(1) | 52(1) | 42(1) | -2(1) | 7(1) | 7(1) |
| C(8) | 100(2) | 64(2) | 43(1) | 5(1) | 16(1) | 18(1) |
| C(9) | 108(2) | 76(2) | 39(1) | -5(1) | -12(1) | 27(2) |
| F(1) | 58(1) | 67(1) | 44(1) | -16(1) | -11(1) | 8(1) |
| F(2) | 75(1) | 58(1) | 69(1) | 6(1) | -23(1) | 20(1) |
| F(3) | 38(1) | 97(1) | 63(1) | -16(1) | 2(1) | -7(1) |
| O(1) | 40(1) | 59(1) | 37(1) | 6(1) | 4(1) | -4(1) |
| O(2) | 58(1) | 38(1) | 38(1) | 1(1) | 1(1) | 9(1) |
| O(3) | 41(1) | 97(1) | 45(1) | -2(1) | 2(1) | -10(1) |
| S(1) | 60(1) | 84(1) | 51(1) | -9(1) | -16(1) | 10(1) |


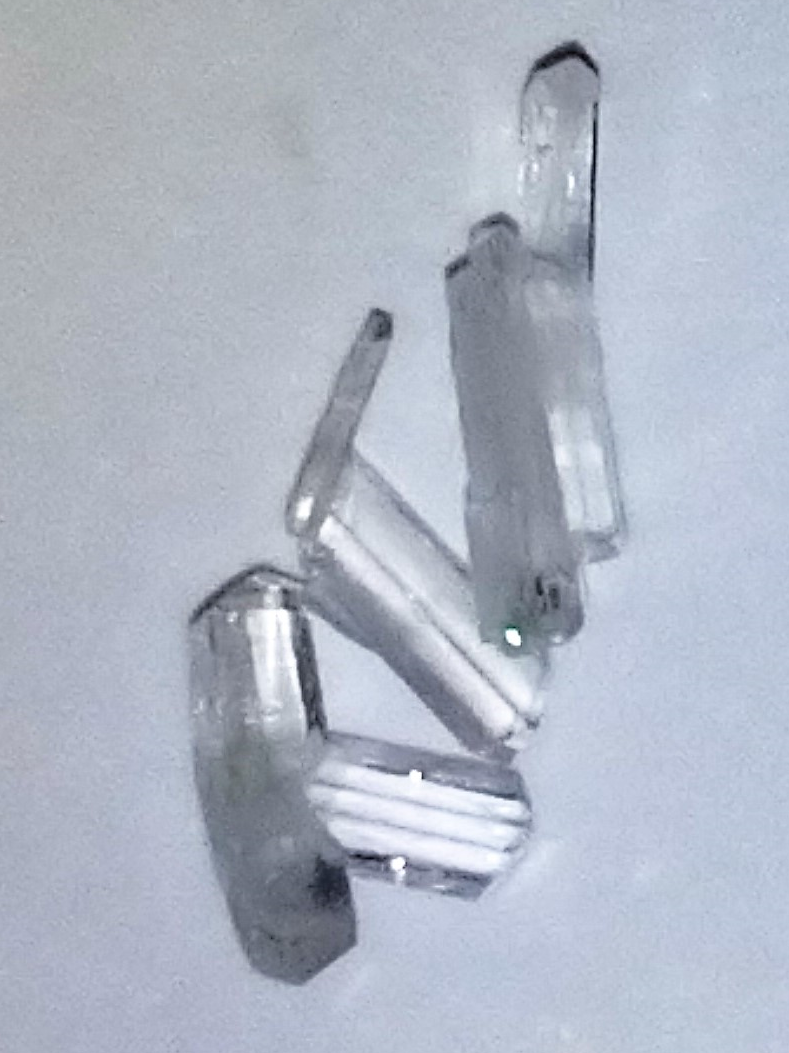


**Figure S26.** Prismatic crystalline solid of 3(5)-trifluoromethyl-4-methyl-5(3)-(thien-2-yl)-1*H*-pyrazole (**5**) obtained from recrystallitazion in hexane.


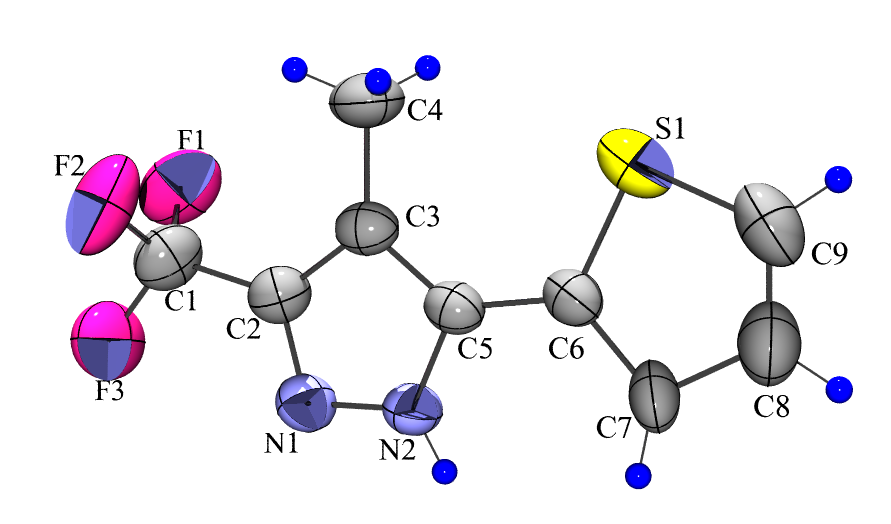


Figure S27. ORTEP drawing of 3(5)-trifluoromethyl-4-methyl-5(3)-(thien-2-yl)-1*H*-pyrazole (5), showing all non-hydrogen atoms and atom-numbering scheme; 50% probability amplitude displacement ellipsoids are shown.


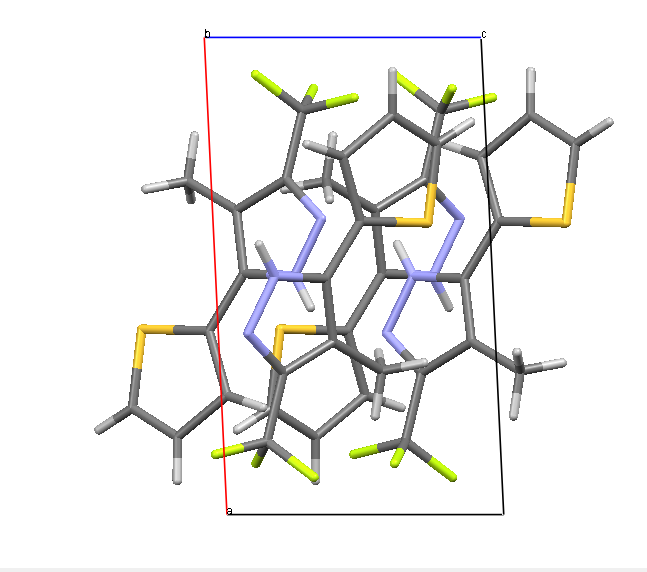


**Figure S28.** Crystalline supramolecular packing diagram of 3(5)-trifluoromethyl-4-methyl-5(3)-(thien-2-yl)-1*H*-pyrazole(**5**), view along the *b*-axis.


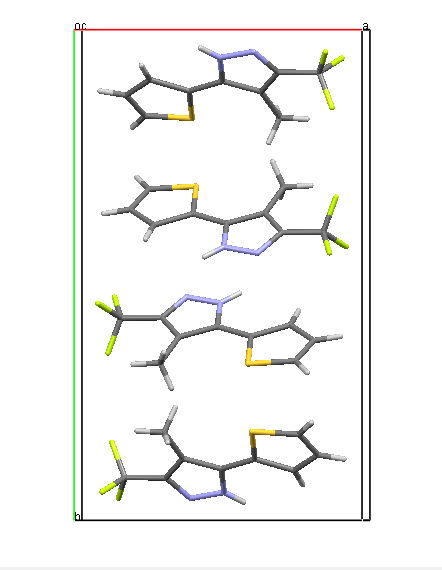


**Figure S29.** Crystalline supramolecular packing diagram of 3(5)-trifluoromethyl-4-methyl-5(3)-(thien-2-yl)-1*H*-pyrazole(**5**), view along the *c*-axis.


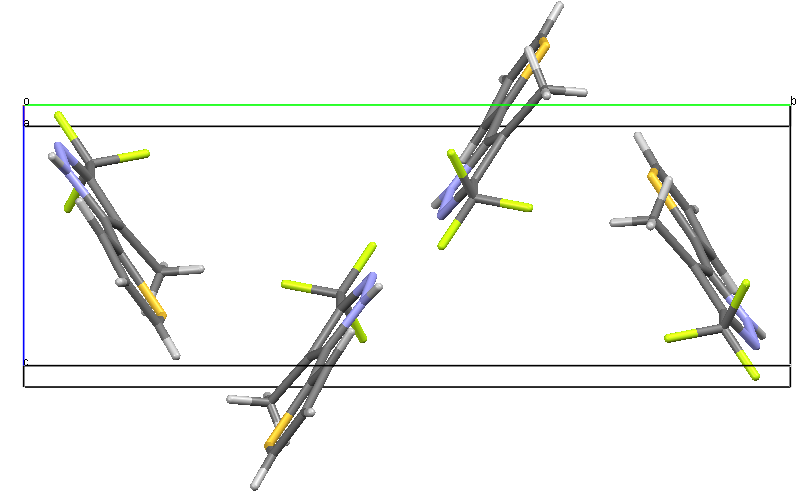


**Figure S30.** Crystalline supramolecular packing diagram of 3(5)-trifluoromethyl-4-methyl-5(3)-(thien-2-yl)-1*H*-pyrazole(**5**), view along the *a*-axis.


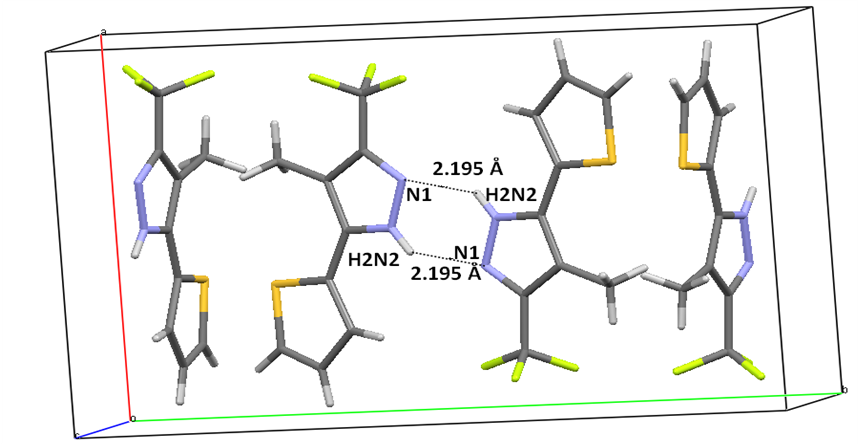


**Figure S31.** Partial view of the infinite 3D-structure formed by the different units of **5**, showing intermolecular hydrogen bonds as dashed lines.

**Table S9. Crystallographic data and structure refinements for 3(5)-trifluoromethyl-4-methyl-5(3)-(thien-2-yl)-1*H*-pyrazole (5).**

| Formula | C9H7F3N2S |
| --- | --- |
| Mass | 232.23 |
| Temperature (K) | 293 |
| Crystal system | Monoclinic |
| Space group | P 21/c |
| Unit cell dimensions | *a* = 10.0517(3) Å α = 90.000(0)º  *b* = 17.1269(5) Å β = 87.2780(10)º  *c* = 5.8235(2) Å  = 90.000(0)º |
| Volume | 1001.41(5) Å3 |
| *Z* | 4 |
| Density (calc.) | 1.540 mg/m3 |
| F (0 0 0) | 472 |
| Crystal size | 0.80 x 0.31 x 0.20 mm3 |
| *θ* range | 3.13 to 28.27° |
| Index range (*h*, *k*, *l*) | -13  *h*  13, -22 *k*  22, -7  *l*  7 |
| Reflexions collected | 30951 |
| Independent reflections | 2434 [R(int) = 0.0602] |
| Data / restraints / parameters | 2434 / 0 / 136 |
| Final *R* indices [I>2(I)] | 1.107 |
| R indices (all data) | *R*1 = 0.0726, w*R*2 = 0.2332 |
| Goodness-of-fit on *F*2 | *R*1 = 0.0813, w*R*2 = 0.2437 |
| Largest diff. Peak and hole | 0.639 and -0.468 e.Å-3 |

**Table S10**. Atomic coordinates (x104) and equivalent isotropic displacement parameters (Å2x103). U(eq) is defined as one third of trace of the orthogonalized Uij tensor

| Atom | x | y | z | U(eq) |
| --- | --- | --- | --- | --- |
| C(1) | -1532(3) | 873(2) | 1573(6) | 65(1) |
| C(2) | -2975(3) | 868(2) | 2284(4) | 51(1) |
| C(3) | -3620(3) | 1261(1) | 4132(4) | 49(1) |
| C(4) | -3012(3) | 1791(2) | 5849(6) | 70(1) |
| C(5) | -4949(2) | 1052(1) | 3978(4) | 45(1) |
| C(6) | -6150(3) | 1248(1) | 5330(4) | 48(1) |
| C(7) | -7503(3) | 1019(2) | 4793(5) | 59(1) |
| C(8) | -8372(4) | 1335(2) | 6661(7) | 80(1) |
| C(9) | -7771(4) | 1751(2) | 8234(6) | 79(1) |
| F(1) | -782(2) | 579(2) | 3209(4) | 92(1) |
| F(2) | -1073(2) | 1589(1) | 1136(5) | 99(1) |
| F(3) | -1260(2) | 453(2) | -305(4) | 96(1) |
| N(1) | -3798(2) | 449(1) | 1068(4) | 54(1) |
| N(2) | -4995(2) | 571(1) | 2150(4) | 50(1) |
| S(1) | -6113(1) | 1809(1) | 7759(1) | 77(1) |

**Table S11**. Bond lengths (Å) for **5**.

| Atom 1 | Atom 2 | Length (Å) |
| --- | --- | --- |
| C(1) | F(3) | 1.326(4) |
| C(1) | F(2) | 1.330(4) |
| C(1) | F(1) | 1.340(4) |
| C(1) | C(2) | 1.489(4) |
| C(2) | N(1) | 1.326(3) |
| C(2) | C(3) | 1.402(4) |
| C(3) | C(5) | 1.390(3) |
| C(3) | C(4) | 1.502(4) |
| C(5) | N(2) | 1.349(3) |
| C(5) | C(6) | 1.450(3) |
| C(6) | C(7) | 1.464(4) |
| C(6) | S(1) | 1.712(2) |
| C(7) | C(8) | 1.466(4) |
| C(8) | C(9) | 1.329(6) |
| C(9) | S(1) | 1.679(4) |
| N(1) | N(2) | 1.348(3) |

**Table S12. Bond angles [o] for 5.**

| Atom 1 | Atom 2 | | Atom 3 | | angle | |  |
| --- | --- | --- | --- | --- | --- | --- | --- |
| F(3) | | C(1) | | F(2) | | 106.6(3) | |
| F(3) | | C(1) | | F(1) | | 106.4(3) | |
| F(2) | | C(1) | | F(1) | | 106.3(3) | |
| F(3) | | C(1) | | C(2) | | 112.7(3) | |
| F(2) | | C(1) | | C(2) | | 112.4(2) | |
| F(1) | | C(1) | | C(2) | | 111.9(3) | |
| N(1) | | C(2) | | C(3) | | 113.1(2) | |
| N(1) | | C(2) | | C(1) | | 118.6(2) | |
| C(3) | | C(2) | | C(1) | | 128.3(2) | |
| C(5) | | C(3) | | C(2) | | 103.8(2) | |
| C(5) | | C(3) | | C(4) | | 128.5(3) | |
| C(2) | | C(3) | | C(4) | | 127.8(3) | |
| N(2) | | C(5) | | C(3) | | 106.1(2) | |
| N(2) | | C(5) | | C(6) | | 120.8(2) | |
| C(3) | | C(5) | | C(6) | | 133.1(2) | |
| C(5) | | C(6) | | C(7) | | 125.4(2) | |
| C(5) | | C(6) | | S(1) | | 121.93(19) | |
| C(7) | | C(6) | | S(1) | | 112.62(18) | |
| C(6) | | C(7) | | C(8) | | 105.6(3) | |
| C(9) | | C(8) | | C(7) | | 115.8(3) | |
| C(8) | | C(9) | | S(1) | | 113.5(3) | |
| C(2) | | N(1) | | N(2) | | 103.4(2) | |
| N(1) | | N(2) | | C(5) | | 113.6(2) | |
| C(9) | | S(1) | | C(6) | | 92.45(16) | |

**Table S13**. Hydrogen bonding geometry for **5** (Å and °).

| D-H...A | d(D-H) | d(H...A) | d(D...A) | <(DHA) |
| --- | --- | --- | --- | --- |
| N2-H2...N1 | 0.8200(0) | 2.195(0) | 2.872(3) | 140.00(0) |

**Table S14**. Hydrogens coordinates (x 104) and isotropic displacement parameters (Å2 x 103) for **5**.

| Atom | x | Y | z | U(eq) |
| --- | --- | --- | --- | --- |
| H(4A) | -2069 | 1824 | 5521 | 105 |
| H(4B) | -3180 | 1585 | 7369 | 105 |
| H(4C) | -3399 | 2301 | 5754 | 105 |
| H(7) | -7758 | 732 | 3531 | 70 |
| H(8) | -9287 | 1250 | 6739 | 96 |
| H(9) | -8224 | 1988 | 9478 | 95 |
| H(2N2) | -5657 | 371 | 1628 | 74 |

**Table S15**. Atomic displacement parameters (Å2) to **5**.

| Atom | U11 | U22 | U33 | U23 | U13 | U12 |
| --- | --- | --- | --- | --- | --- | --- |
| C(1) | 51(1) | 64(1) | 80(2) | 0(1) | -10(1) | 8(1) |
| C(2) | 51(1) | 47(1) | 55(1) | 2(1) | -8(1) | 3(1) |
| C(3) | 57(1) | 43(1) | 48(1) | 2(1) | -10(1) | -4(1) |
| C(4) | 76(2) | 72(1) | 63(2) | -13(1) | -16(1) | -17(1) |
| C(5) | 57(1) | 38(1) | 41(1) | -1(1) | -4(1) | -2(1) |
| C(6) | 61(1) | 42(1) | 41(1) | -1(1) | 1(1) | -3(1) |
| C(7) | 56(1) | 57(1) | 61(2) | -6(1) | 22(1) | -5(1) |
| C(8) | 68(2) | 83(2) | 86(2) | -3(2) | 21(1) | -6(1) |
| C(9) | 97(3) | 77(2) | 61(2) | -5(2) | 20(1) | 9(2) |
| F(1) | 63(1) | 102(2) | 114(2) | 12(1) | -31(1) | 9(1) |
| F(2) | 63(1) | 76(1) | 156(2) | 20(1) | 15(1) | -6(1) |
| F(3) | 63(1) | 124(2) | 100(2) | -27(1) | 8(1) | 19(1) |
| N(1) | 52(1) | 55(1) | 54(1) | -10(1) | -2(1) | 5(1) |
| N(2) | 50(1) | 52(1) | 48(1) | -10(1) | -5(1) | -1(1) |
| S(1) | 93(1) | 80(1) | 57(1) | -16(1) | 0(1) | 4(1) |

**Table S16**. Torsion angles [o] for **5**.

| Atom 1 | Atom 2 | Atom 3 | Atom 4 | Angle (º) |
| --- | --- | --- | --- | --- |
| F(3) | C(1) | C(2) | N(1) | 1.8(4) |
| F(2) | C(1) | C(2) | N(1) | 122.4(3) |
| F(1) | C(1) | C(2) | N(1) | -118.1(3) |
| F(3) | C(1) | C(2) | C(3) | -178.1(3) |
| F(2) | C(1) | C(2) | C(3) | -57.6(4) |
| F(1) | C(1) | C(2) | C(3) | 62.0(4) |
| N(1) | C(2) | C(3) | C(5) | -0.1(3) |
| C(1) | C(2) | C(3) | C(5) | 179.8(3) |
| N(1) | C(2) | C(3) | C(4) | -179.5(3) |
| C(1) | C(2) | C(3) | C(4) | 0.5(5) |
| C(2) | C(3) | C(5) | N(2) | 0.3(3) |
| C(4) | C(3) | C(5) | N(2) | 179.6(3) |
| C(2) | C(3) | C(5) | C(6) | -179.8(3) |
| C(4) | C(3) | C(5) | C(6) | -0.5(5) |
| N(2) | C(5) | C(6) | C(7) | -5.4(4) |
| C(3) | C(5) | C(6) | C(7) | 174.7(3) |
| N(2) | C(5) | C(6) | S(1) | 176.01(18) |
| C(3) | C(5) | C(6) | S(1) | -3.9(4) |
| C(5) | C(6) | C(7) | C(8) | 178.8(3) |
| S(1) | C(6) | C(7) | C(8) | -2.5(3) |
| C(6) | C(7) | C(8) | C(9) | 2.4(4) |
| C(7) | C(8) | C(9) | S(1) | -1.2(5) |
| C(3) | C(2) | N(1) | N(2) | -0.1(3) |
| C(1) | C(2) | N(1) | N(2) | 179.9(2) |
| C(2) | N(1) | N(2) | C(5) | 0.3(3) |
| C(3) | C(5) | N(2) | N(1) | -0.4(3) |
| C(6) | C(5) | N(2) | N(1) | 179.7(2) |
| C(8) | C(9) | S(1) | C(6) | -0.3(3) |
| C(5) | C(6) | S(1) | C(9) | -179.5(2) |
| C(7) | C(6) | S(1) | C(9) | 1.8(2) |
